# Supplementary material
Source: Royal Society of Chemistry journal article supplement (doi:10.1039/d6ob00411c)
Supplement: d6ob00411c1.pdf [file d6ob00411c1.pdf]

## Synthesis, molecular modeling and anti-inflammatory activity of new benzo[a]pyrano[2,3-c]phenazine compounds

Quynh Giang Nguyen Thi,<sup>a</sup> Tuan Anh Nguyen,<sup>\*a,b</sup> Ha Thanh Nguyen,<sup>\*a,b</sup> Hai Pham-The,<sup>c</sup> Phuong Hoang Thi,<sup>a,b</sup> Thach Lien Nguyen,<sup>c,d</sup> Tuyet Anh Dang Thi,<sup>a,b</sup> Giang Le-Nhat-Thuy,<sup>a,b</sup> Mai Dang Thi,<sup>a</sup> Thu Ha Nguyen Thi,<sup>a,b</sup> Julien Braire,<sup>e</sup> and Tuyen Van Nguyen<sup>a,b</sup>

<sup>a</sup>Institute of Chemistry, Vietnam Academy of Science and Technology (VAST), 18 Hoang Quoc Viet, Nghia Do, Hanoi, Vietnam. Email: [hathanhnguyen1512@gmail.com](mailto:hathanhnguyen1512@gmail.com) (H. T. Nguyen), [nguyentuananhvh@gmail.com](mailto:nguyentuananhvh@gmail.com) (T. A. Nguyen)

<sup>b</sup>Graduate University of Science and Technology, VAST, 18 Hoang Quoc Viet, Nghia Do, Hanoi, Vietnam

<sup>c</sup>University of Science and Technology of Hanoi (USTH), VAST, 18 Hoang Quoc Viet, Nghia Do, Hanoi, Vietnam

<sup>d</sup>Hanoi University of Pharmacy, 13-15 Le Thanh Tong, Cua Nam, Hanoi, Vietnam

<sup>e</sup>Novalix, Chau. du Vexin, 27100 Val-de-Reuil, France

### LIST OF CONTENT

|                                                                                                            |    |
|------------------------------------------------------------------------------------------------------------|----|
| (1-(4-Chlorophenyl)-1H-benzo[a]pyrano[2,3-c]phenazin-2-yl)(phenyl)methanone (7a). .....                    | 2  |
| (1-(4-Bromophenyl)-1H-benzo[a]pyrano[2,3-c]phenazin-2-yl)(phenyl)methanone (7b). .....                     | 3  |
| (1-(3-Methoxyphenyl)-1H-benzo[a]pyrano[2,3-c]phenazin-2-yl)(phenyl)methanone (7c). .....                   | 5  |
| (1-(3-Nitrophenyl)-1H-benzo[a]pyrano[2,3-c]phenazin-2-yl)(phenyl)methanone (7d). .....                     | 6  |
| 4-(2-(4-Fluorobenzoyl)-1H-benzo[a]pyrano[2,3-c]phenazin-1-yl)benzotrilee (7e). .....                       | 7  |
| (4-Fluorophenyl)(1-(4-(trifluoromethyl)phenyl)-1H-benzo[a]pyrano[2,3-c]phenazin-2-yl)methanone (7f). ..... | 9  |
| (4-Fluorophenyl)(1-(3,4,5-trimethoxyphenyl)-1H-benzo[a]pyrano[2,3-c]phenazin-2-yl)methanone (7g). .....    | 10 |
| (4-Fluorophenyl)(1-phenyl-1H-benzo[a]pyrano[2,3-c]phenazin-2-yl)methanone (7h). .....                      | 12 |
| (3-Bromophenyl)(1-(4-methoxyphenyl)-1H-benzo[a]pyrano[2,3-c]phenazin-2-yl)methanone (7i). .....            | 13 |
| (3-Bromophenyl)(1-(naphthalen-2-yl)-1H-benzo[a]pyrano[2,3-c]phenazin-2-yl)methanone (7j). .....            | 14 |
| (1-(Benzo[d][1,3]dioxol-5-yl)-1H-benzo[a]pyrano[2,3-c]phenazin-2-yl)(3-bromophenyl)methanone (7k). .....   | 15 |
| (3-Bromophenyl)(1-(2-fluorophenyl)-1H-benzo[a]pyrano[2,3-c]phenazin-2-yl)methanone (7l). .....             | 17 |
| (2-Chlorophenyl)(1-(2,3,4-trimethoxyphenyl)-1H-benzo[a]pyrano[2,3-c]phenazin-2-yl)methanone (7m). .....    | 18 |
| (2-Chlorophenyl)(1-(p-tolyl)-1H-benzo[a]pyrano[2,3-c]phenazin-2-yl)methanone (7n). .....                   | 19 |
| (2-Chlorophenyl)(1-(4-fluorophenyl)-1H-benzo[a]pyrano[2,3-c]phenazin-2-yl)methanone (7o). .....            | 21 |
| (2-chlorophenyl)(1-(3,4-dimethoxyphenyl)-1H-benzo[a]pyrano[2,3-c]phenazin-2-yl)methanone (7p). .....       | 22 |

(1-(4-Chlorophenyl)-1H-benzo[a]pyrano[2,3-c]phenazin-2-yl)(phenyl)methanone (7a).

HP03.05V1-CDC13-1H

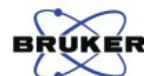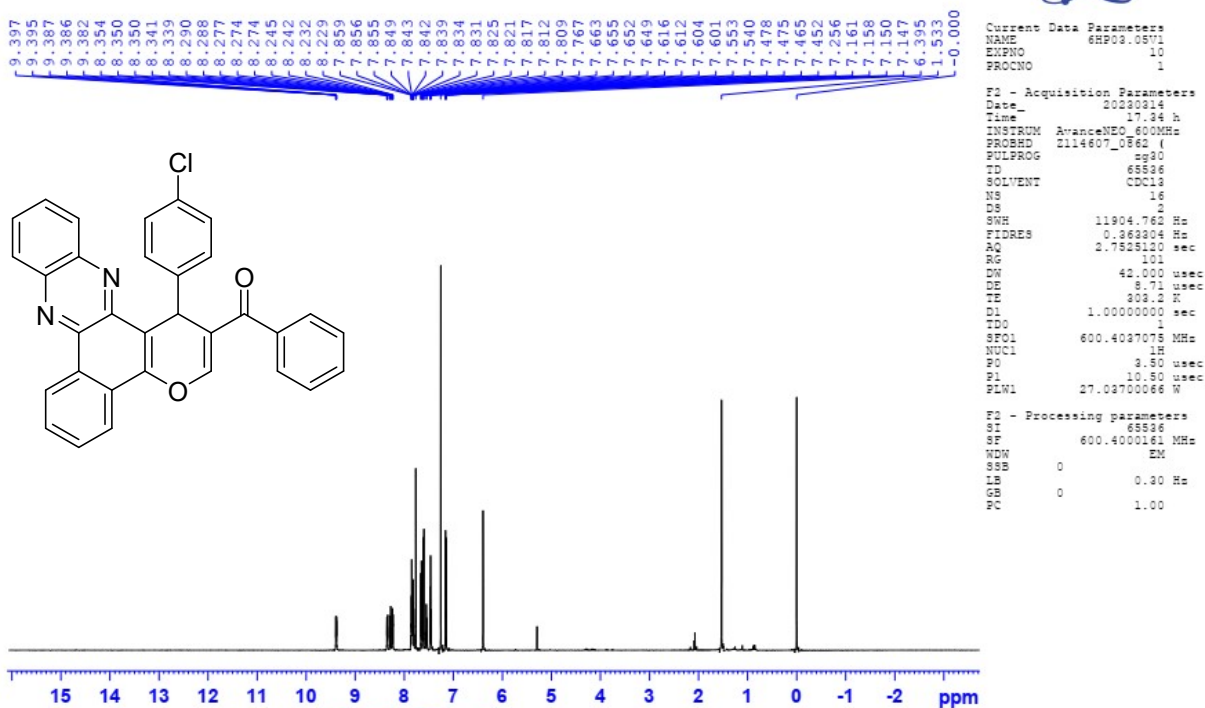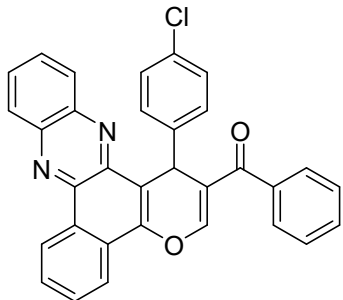

HP03.05V1-CDC13-C13CPD

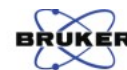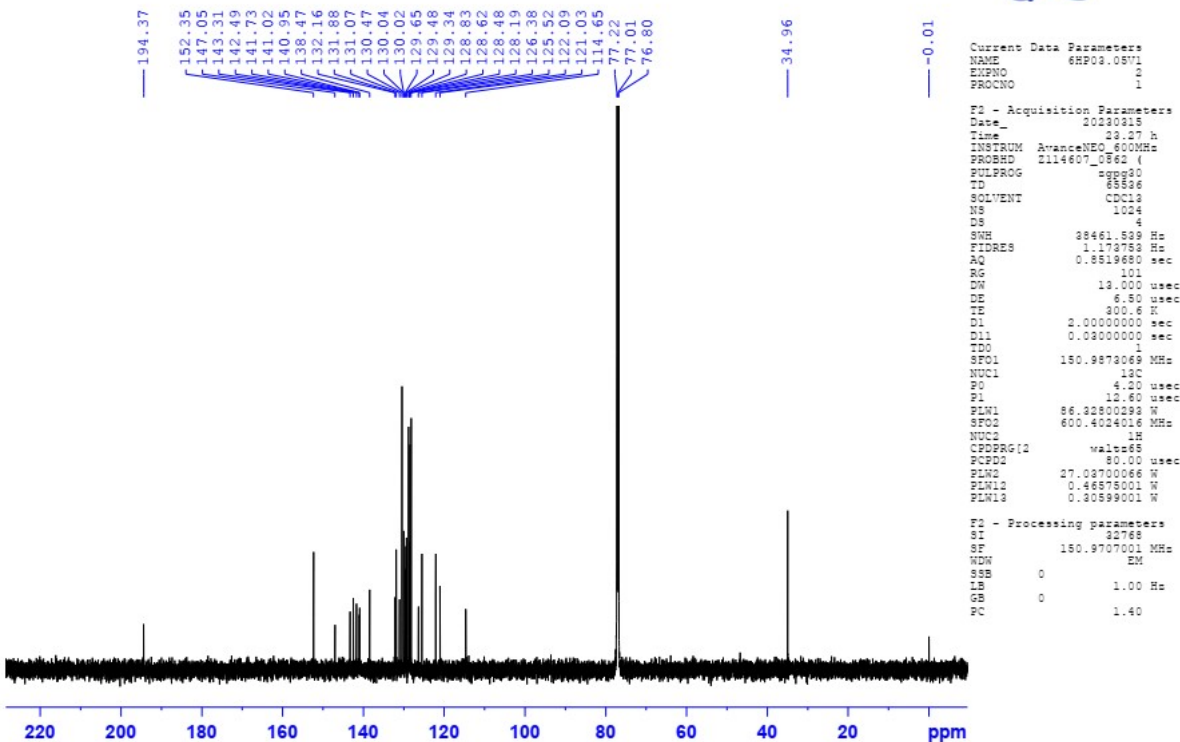

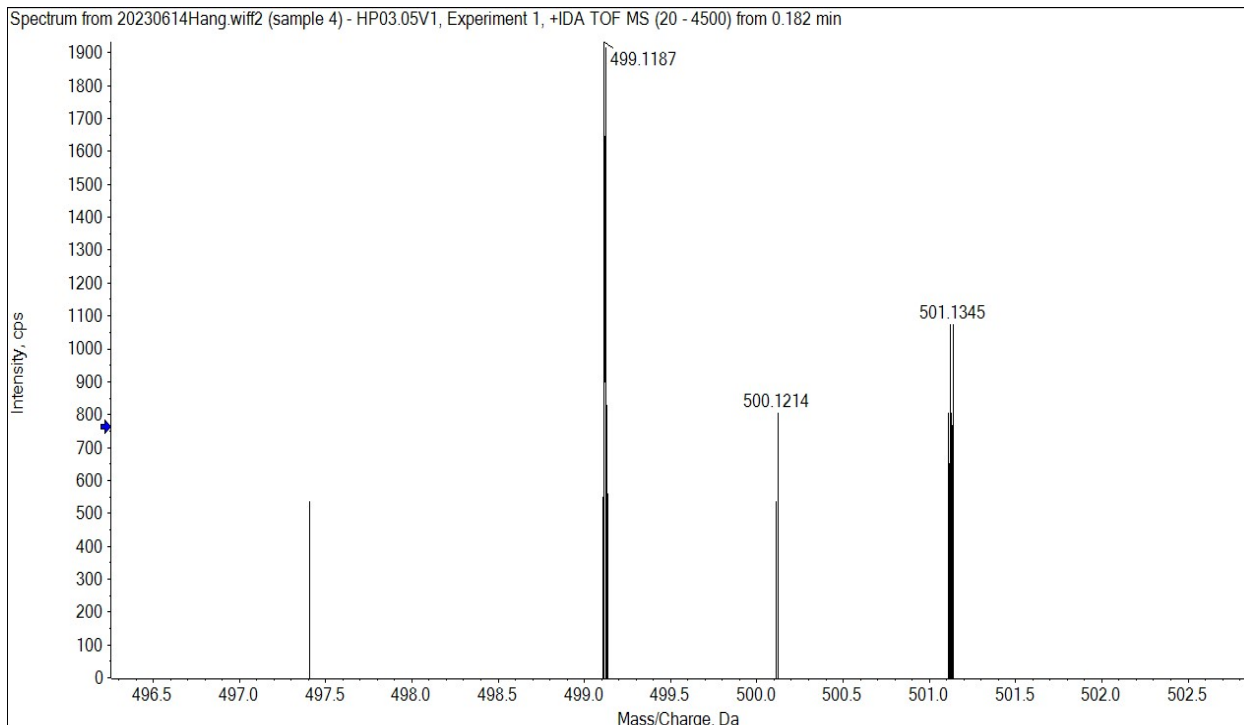

**(1-(4-Bromophenyl)-1H-benzo[a]pyrano[2,3-c]phenazin-2-yl)(phenyl)methanone (7b).**

HP252.91-CDC13-1H

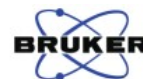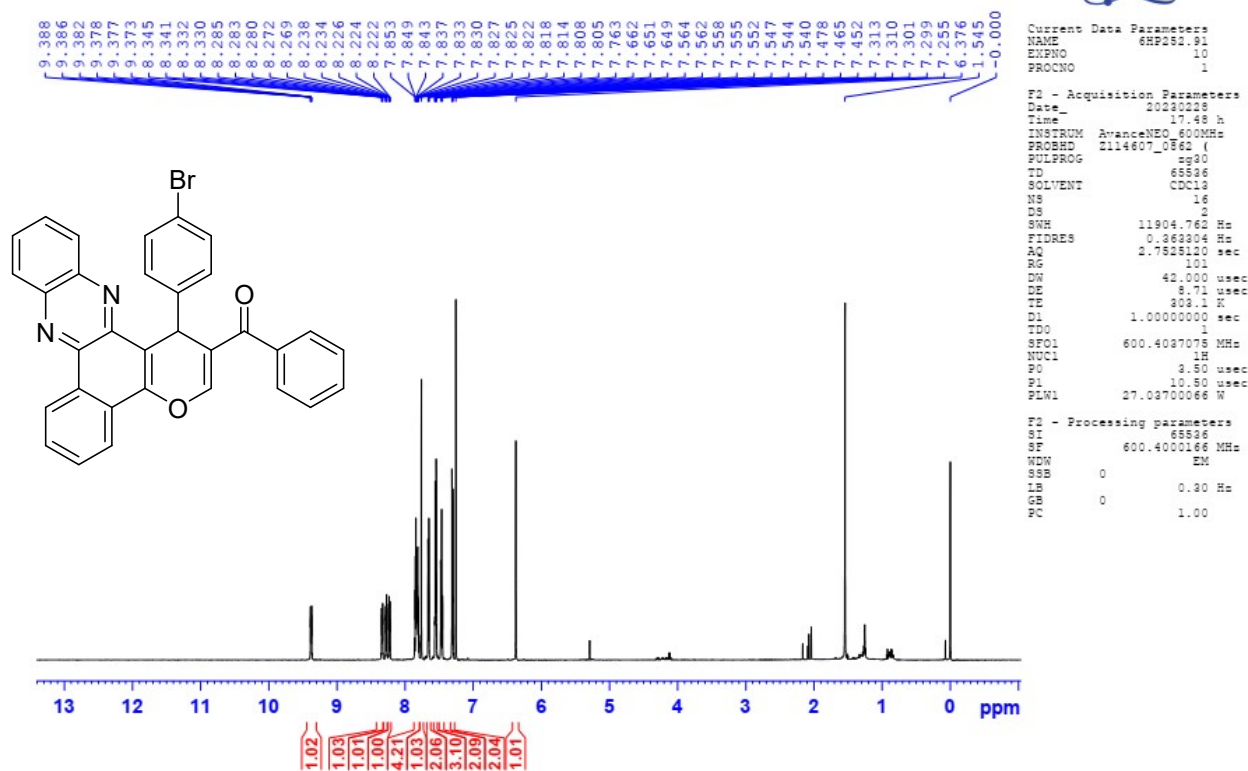

HP252.91-CDC13-C13CPD

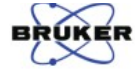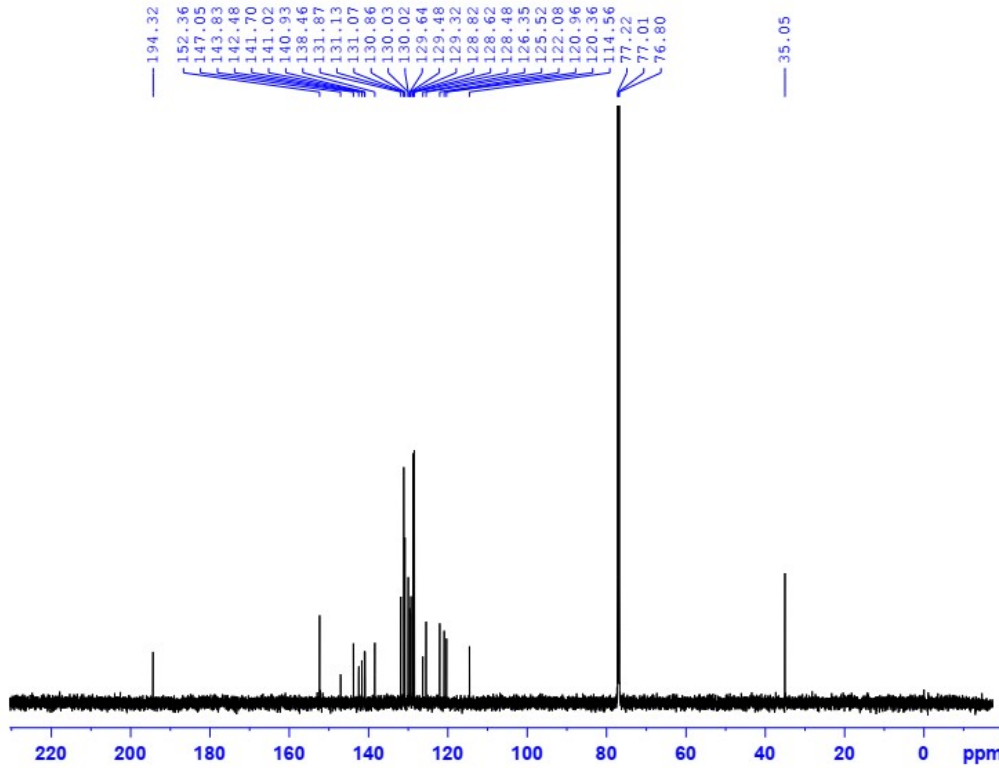

```

Current Data Parameters
NAME      HP252.91
EXPNO    2
PROCNO   1

F2 - Acquisition Parameters
Date_    20230808
Time     22.20 h
INSTRUM  Avance NEO 600MHz
PROBHD   QNP14601_0362 (
PULPROG  zgpg30
TD        65536
NS        101
SOLVENT  CDCl3
DS        4
SWH       38461.839 Hz
FIDRES    1.173783 Hz
AQ        0.8519680 sec
RG        101
DN        13.000 usec
DE        6.50 usec
TE        303.1 K
D1        2.00000000 sec
D11       0.03000000 sec
TDD       1
SFO1      150.9873069 MHz
NUC1      13C
PQ        4.20 usec
PL        12.50 usec
PLW1      86.32800293 N
SFO2      600.4024016 MHz
NUC2      1H
CPDPRG2   waltz16
PCPD2     80.00 usec
PLW2      27.02700066 W
PLW12     0.46575001 W
PLW13     0.30599001 W

F2 - Processing parameters
SI        32768
SF        150.9707001 MHz
WDW       EM
SSB       0
LB        1.00 Hz
GB        0
PC        1.40
    
```

Spectrum from 20230614Hang.wiff2 (sample 1) - HP252.91, Experiment 1, +IDA TOF MS (20 - 4500) from 0.193 min

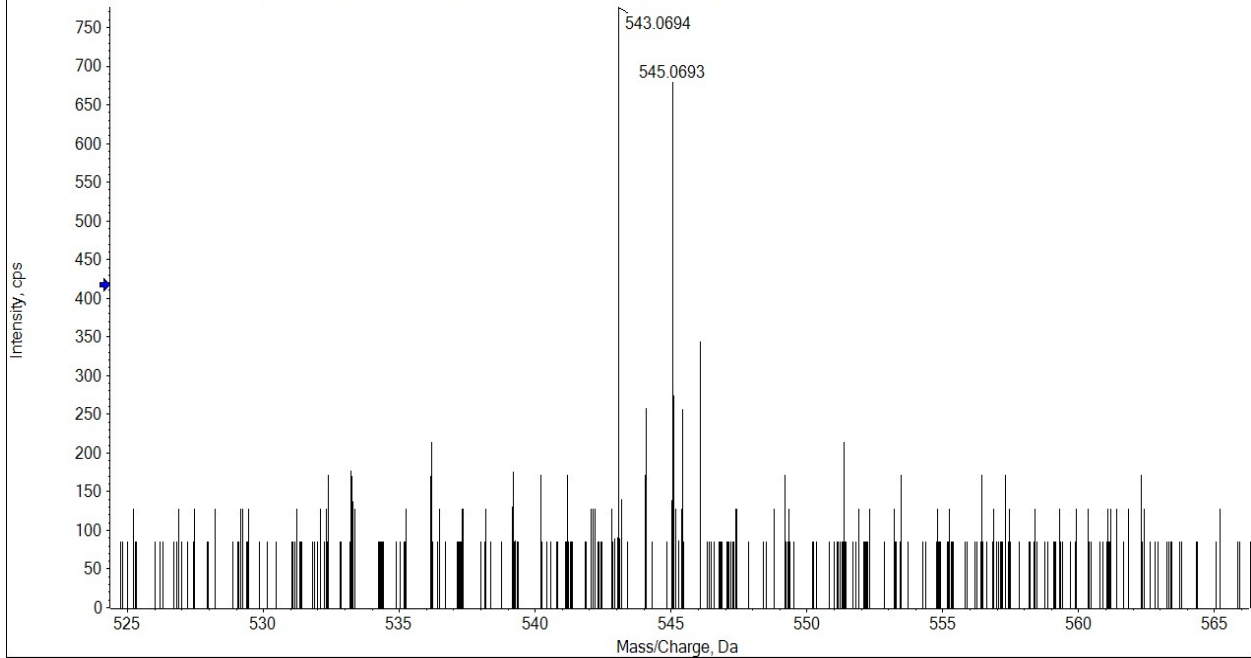

**(1-(3-Methoxyphenyl)-1H-benzo[a]pyrano[2,3-c]phenazin-2-yl)(phenyl)methanone (7c).**

HP252.96V1-CDC13-1H

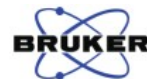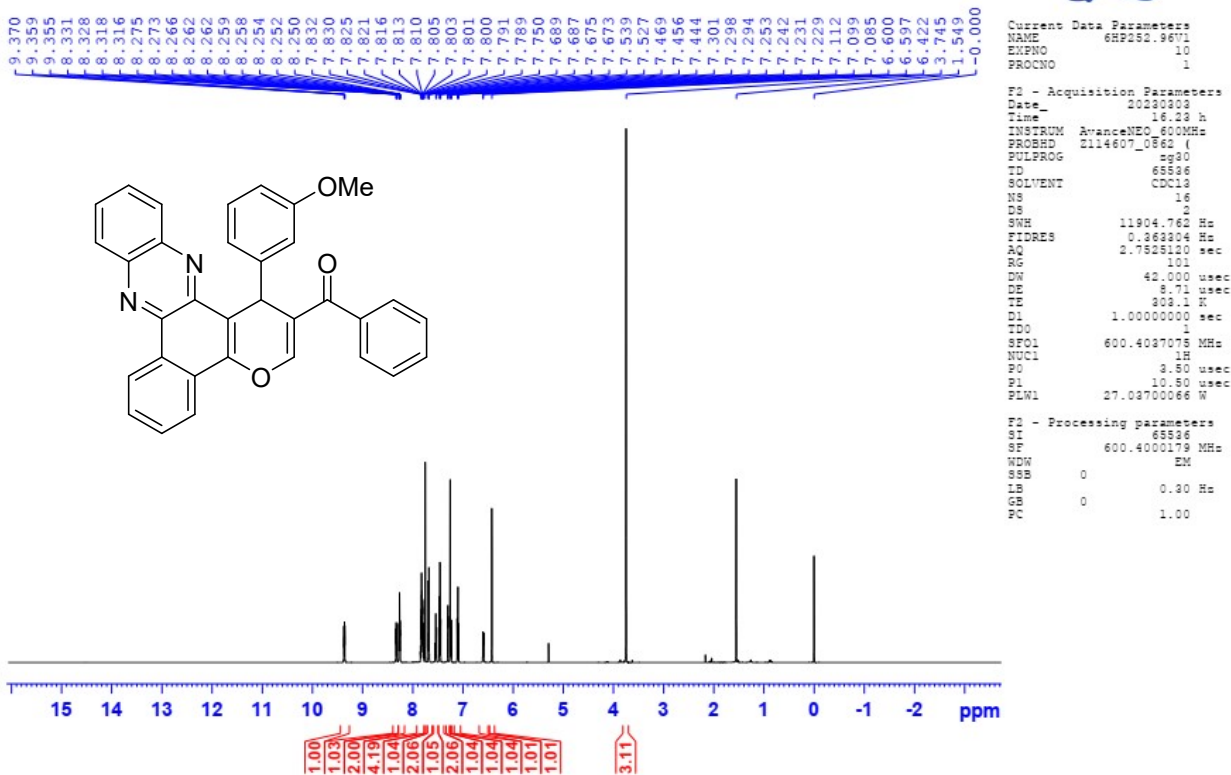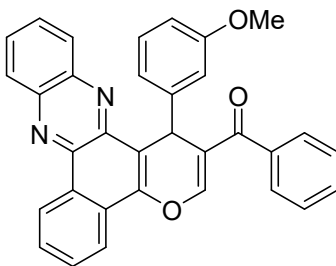

HP252.96V1-CDC13-C13CPD

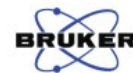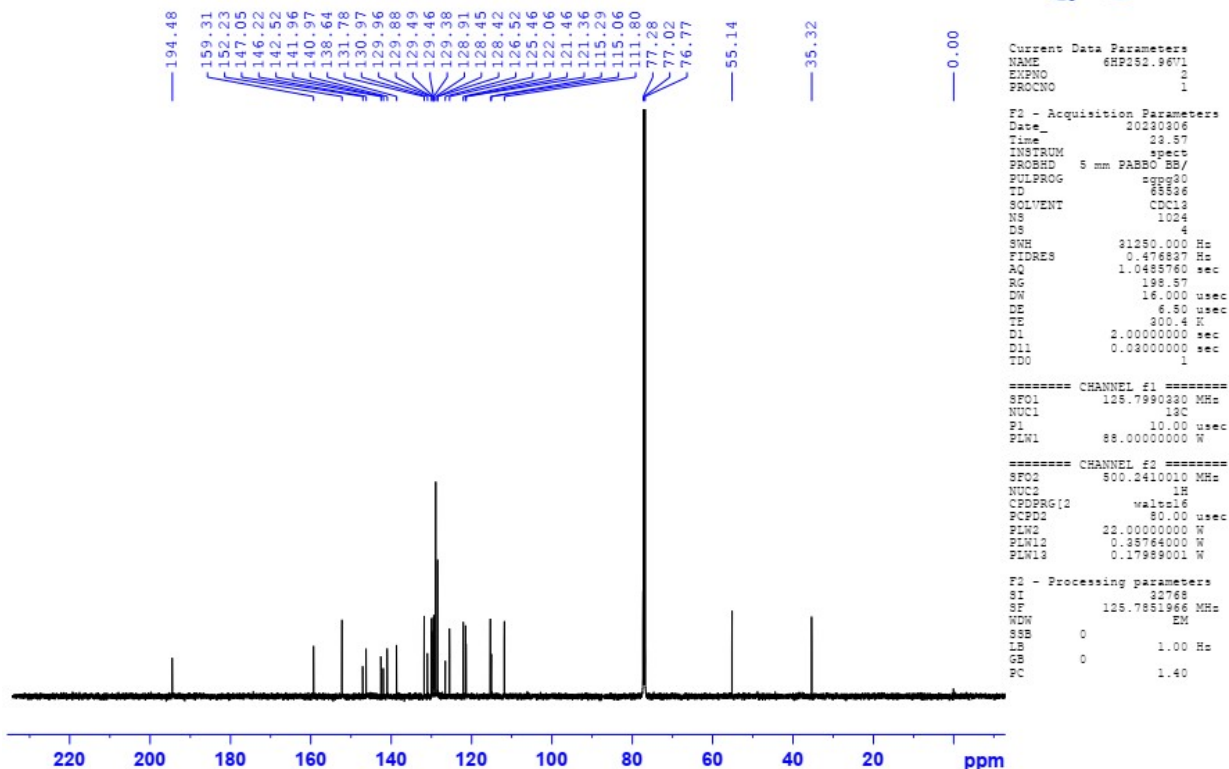

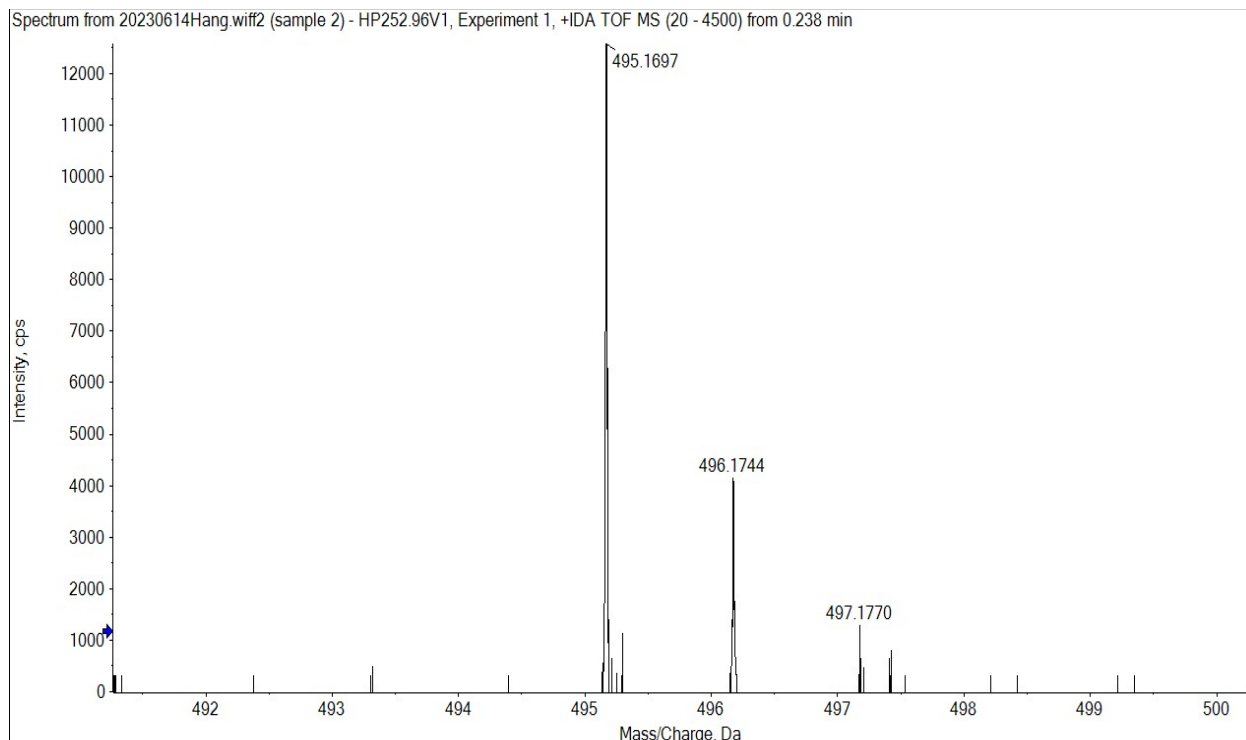

**(1-(3-Nitrophenyl)-1H-benzo[a]pyrano[2,3-c]phenazin-2-yl)(phenyl)methanone (7d).**

HP252.98.02-CDC13-1H

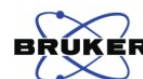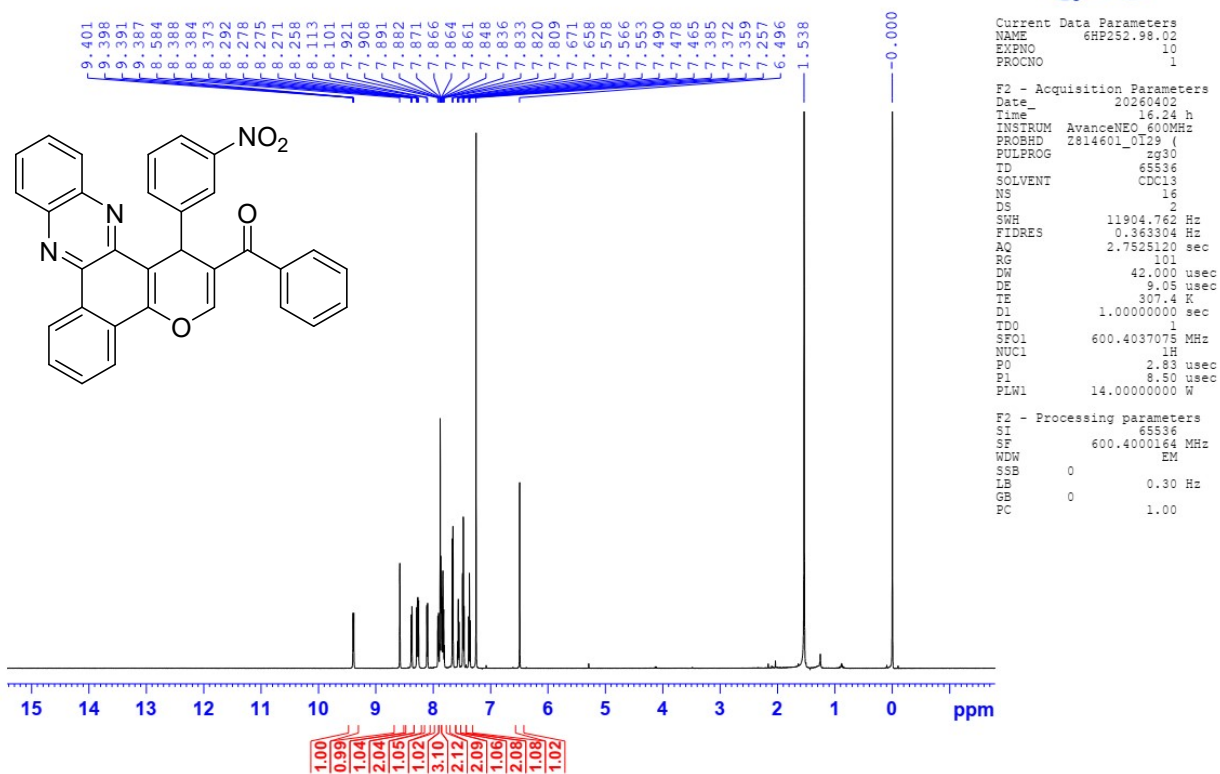

HP252.98V2-CDC13-C13CPD

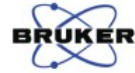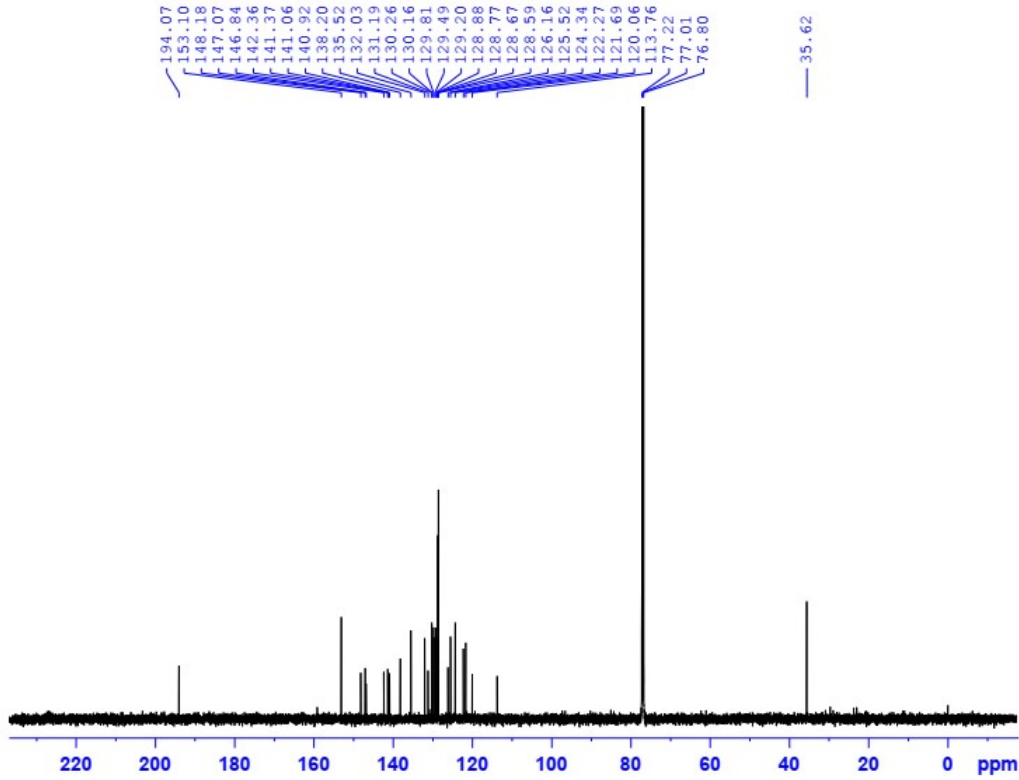

```

Current Data Parameters
NAME      6HP252.98V2
EXPNO    2
PROCNO   1

F2 - Acquisition Parameters
Date_    20230311
Time     3.16 h
INSTRUM  AvanceNEO 600MHz
PROBHD   Z114607_0862 (
PULPROG  zgpg30
TD       65536
SOLVENT  CDC13
NS       512
DS       4
SWH      38461.539 Hz
FIDRES   1.173758 Hz
AQ       0.8519680 sec
RG       101
DN       13.000 usec
DE       6.50 usec
TE       302.1 K
D1       2.00000000 sec
D11      0.02000000 sec
TDO      1
SF01     150.9873069 MHz
NUC1     13C
P0       4.20 usec
P1       12.80 usec
PLW1     86.22820039 W
SF02     600.4024016 MHz
NUC2     1H
CPOPRG[2] waltz65
PCPD2    80.00 usec
PLW2     27.03700066 W
PLW12    0.46875001 W
PLW13    0.205599001 W

F2 - Processing parameters
SI       32768
SF       150.9707001 MHz
WDW      EM
SSB      0
LB       1.00 Hz
GB       0
PC       1.40
    
```

4-(2-(4-Fluorobenzoyl)-1H-benzo[a]pyrano[2,3-c]phenazin-1-yl)benzotrilee (7e).

HP03.27V1-CDC13-1H

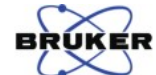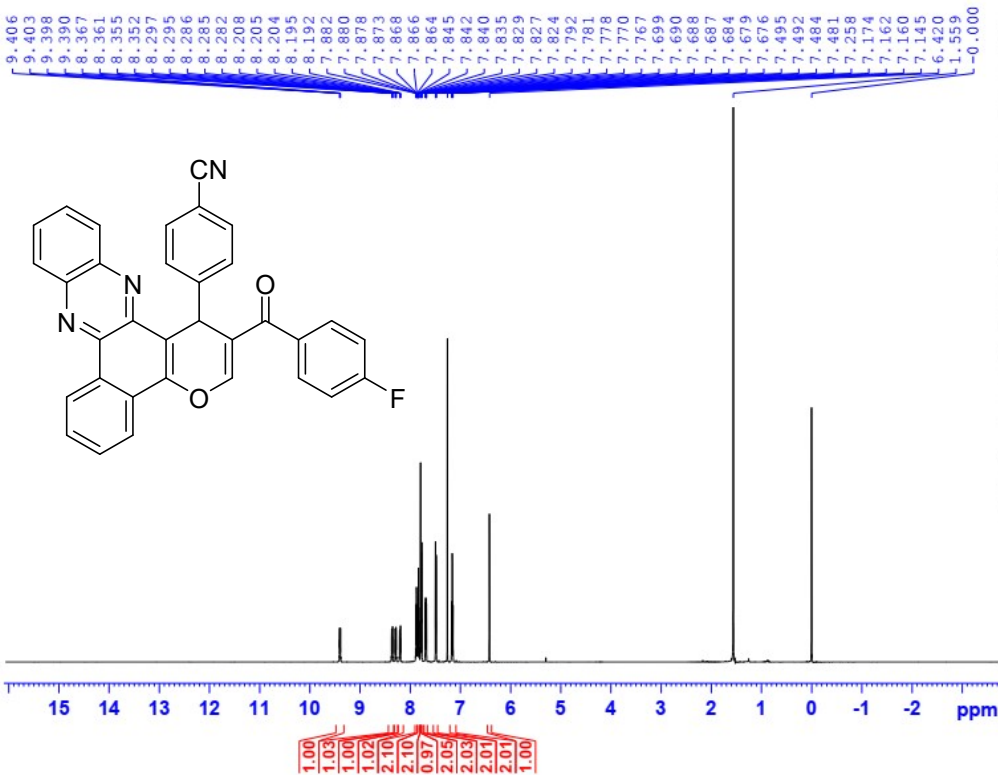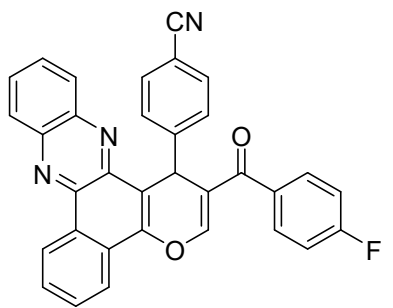

```

Current Data Parameters
NAME      6HP03.27V1
EXPNO    10
PROCNO   1

F2 - Acquisition Parameters
Date_    20230404
Time     3.38 h
INSTRUM  AvanceNEO 600MHz
PROBHD   Z114607_0862 (
PULPROG  zgpg30
TD       65536
SOLVENT  CDC13
NS       16
DS       2
SWH      11904.762 Hz
FIDRES   0.262304 Hz
AQ       2.7525120 sec
RG       101
DN       42.000 usec
DE       8.71 usec
TE       303.2 K
D1       1.00000000 sec
TDO      1
SF01     600.4037075 MHz
NUC1     1H
P0       3.50 usec
P1       10.50 usec
PLW1     27.03700066 W

F2 - Processing parameters
SI       65536
SF       600.4000150 MHz
WDW      EM
SSB      0
LB       0.30 Hz
GB       0
PC       1.00
    
```

# HP03.27V1-CDC13-C13CPD

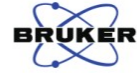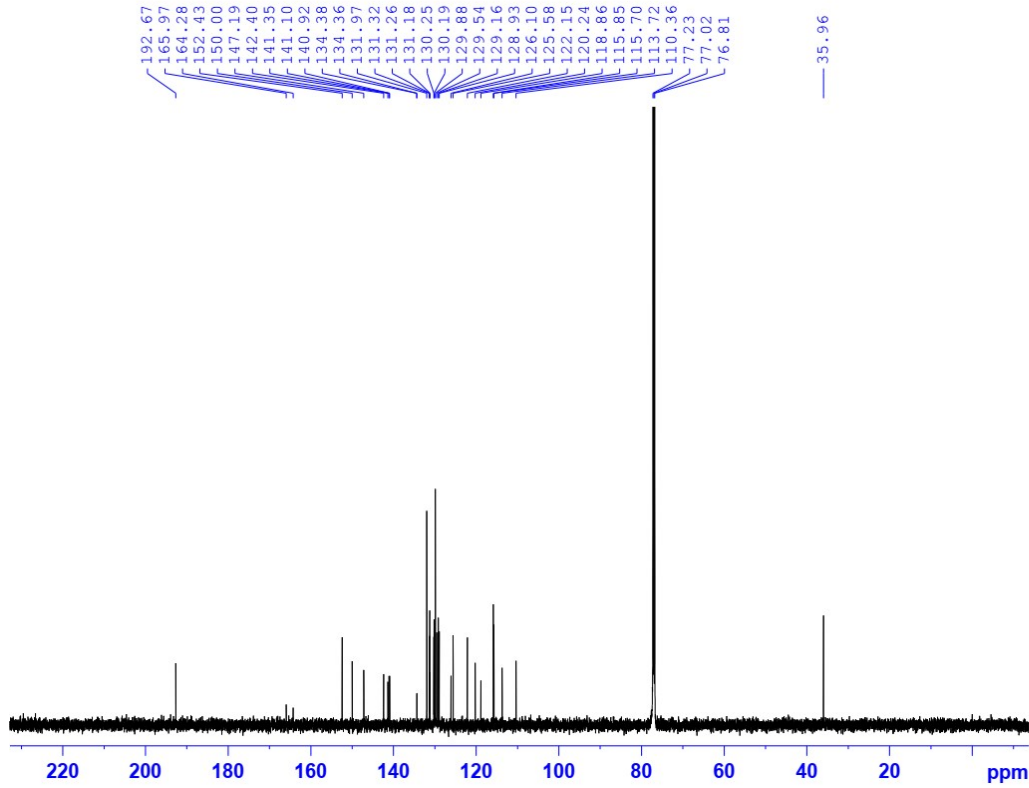

Current Data Parameters  
NAME 6HP03.27V1  
EXPNO 2  
PROCNO 1

F2 - Acquisition Parameters  
Date\_ 20230405  
Time 20.06 h  
INSTRUM AvanceNEO 600MHz  
PROBHD Z114607 0B62 (zpgp30  
PULPROG zpgp30  
TD 65536  
SOLVENT CDC13  
NS 1024  
DS 4  
SWH 38461.539 Hz  
FIDRES 1.173753 Hz  
AQ 0.8519680 sec  
RG 101  
SW 13.000 usec  
DE 6.50 usec  
TE 300.2 K  
D1 2.00000000 sec  
D11 0.03000000 sec  
TDO  
SFO1 150.9873069 MHz  
NUC1 13C  
PO 4.20 usec  
P1 12.60 usec  
PLW1 86.32800293 W  
SFO2 600.4024016 MHz  
NUC2 1H  
CPDPRG[2] waltz65  
PCPD2 80.00 usec  
PLW2 27.03700066 W  
PLW12 0.46575001 W  
PLW13 0.30599001 W

F2 - Processing parameters  
SI 32768  
SF 150.9707001 MHz  
WDW EM  
SSB 0  
LB 1.00 Hz  
GB 0  
PC 1.40

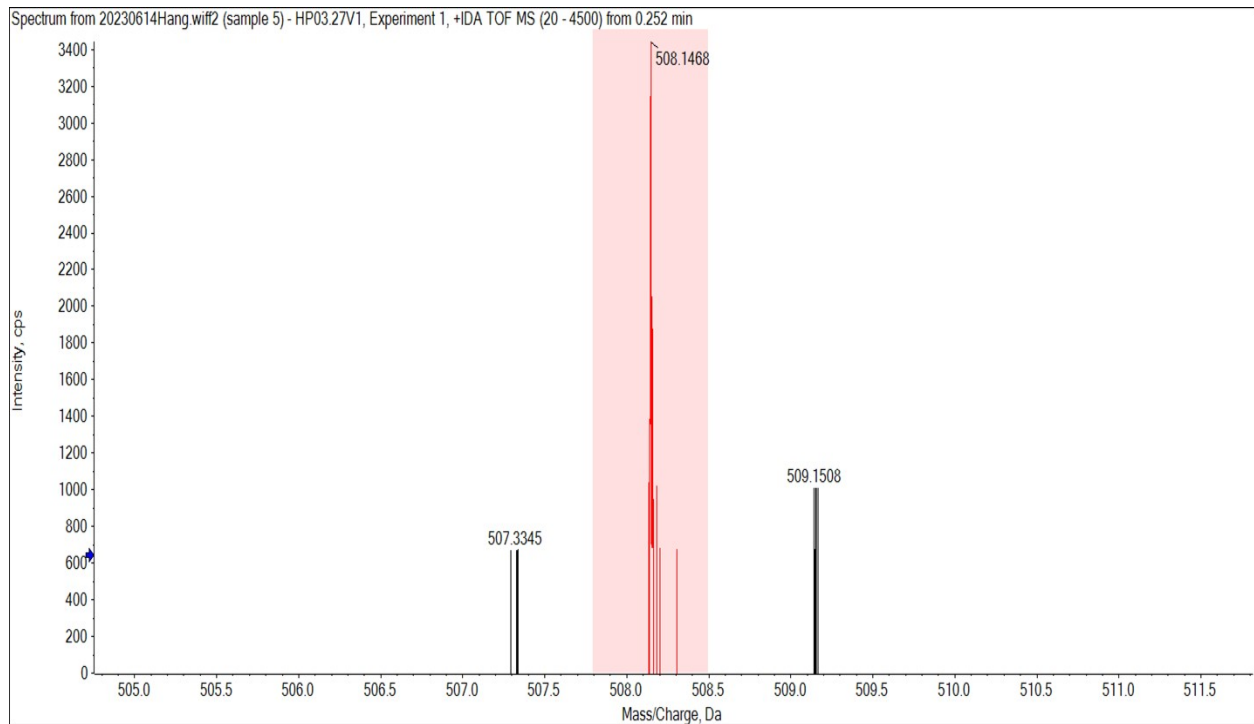

# (4-Fluorophenyl)(1-(4-(trifluoromethyl)phenyl)-1H-benzo[a]pyrano[2,3-c]phenazin-2-yl)methanone (7f).

HP03.28-CDC13-1H

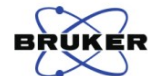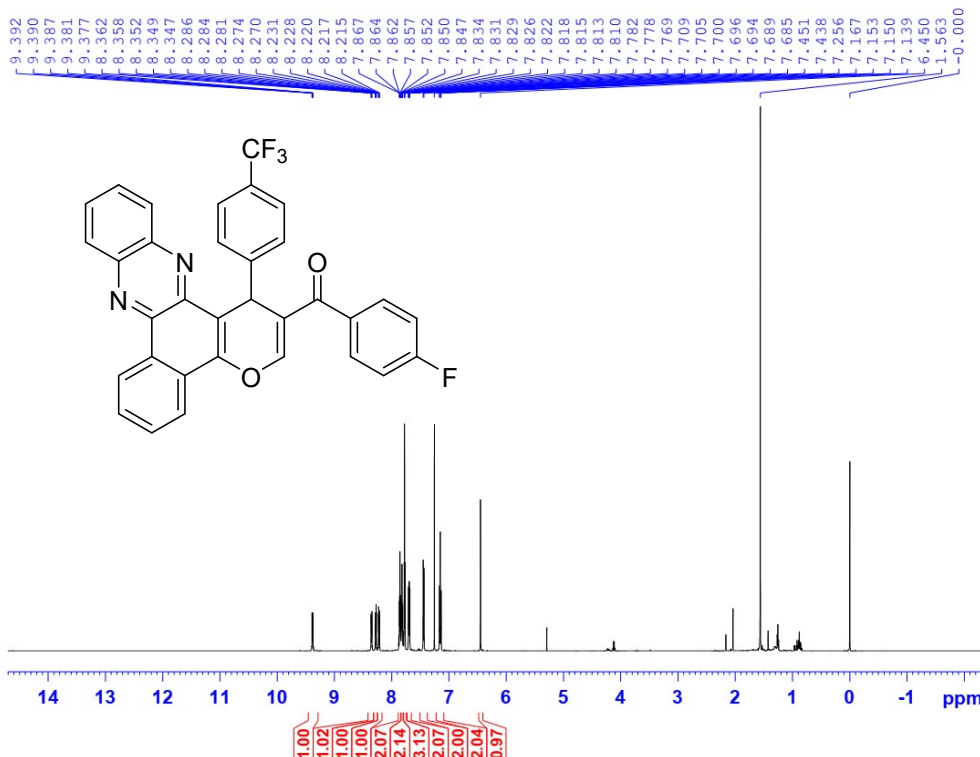

Current Data Parameters  
NAME 6HP03.28  
EXPNO 10  
PROCNO 1

F2 - Acquisition Parameters  
Date\_ 20230405  
Time\_ 17.40 h  
INSTRUM AvanceNEO 600MHz  
PROBHD Z114607\_0862 (1  
PULPROG zg30  
TD 65536  
SOLVENT CDC13  
NS 16  
DS 2  
SWH 11904.762 Hz  
FIDRES 0.363304 Hz  
AQ 2.7525120 sec  
RG 101  
DW 42.000 usec  
DE 8.71 usec  
TE 303.1 K  
D1 1.00000000 sec  
TDO 1  
SF01 600.4037075 MHz  
NUC1 1H  
PO 3.50 usec  
P1 10.50 usec  
PLW1 27.03700066 W

F2 - Processing parameters  
SI 65536  
SF 600.4000160 MHz  
WDW EM  
SSB 0  
LB 0.30 Hz  
GB 0  
PC 1.00

HP03.28-CDC13-C13CPD

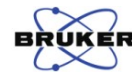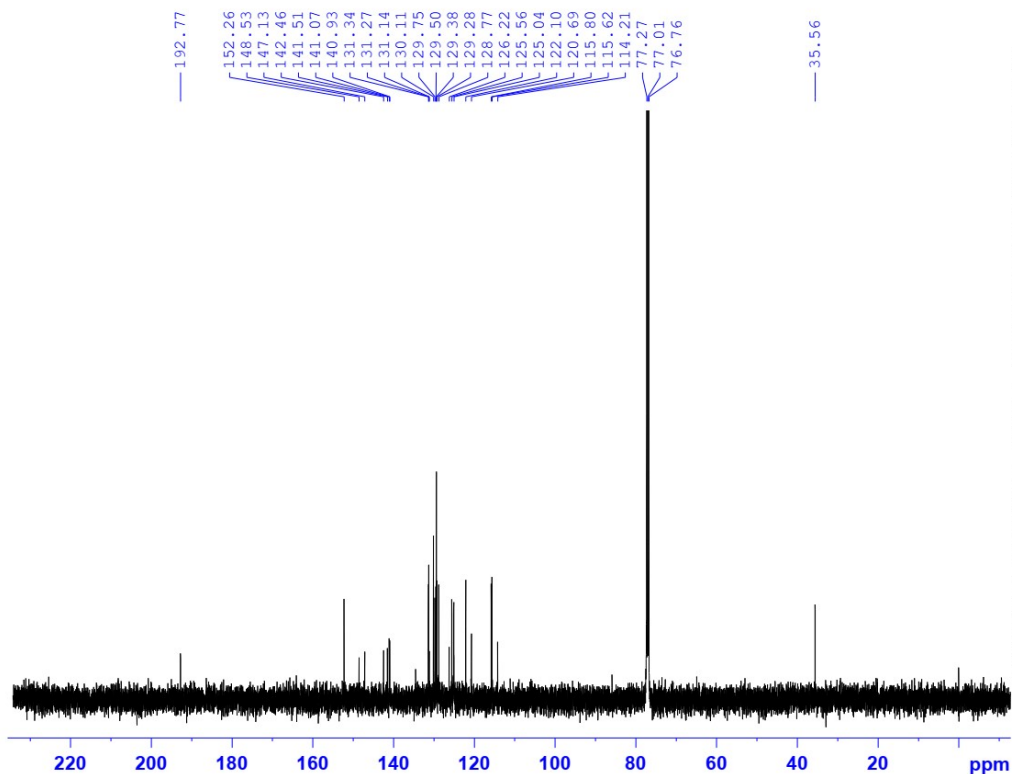

Current Data Parameters  
NAME 6HP03.28  
EXPNO 2  
PROCNO 1

F2 - Acquisition Parameters  
Date\_ 20230410  
Time\_ 17.13  
INSTRUM spect  
PROBHD 5 mm FABS0 BB/  
PULPROG zgpg30  
TD 65536  
SOLVENT CDC13  
NS 256  
DS 4  
SWH 31250.000 Hz  
FIDRES 0.476837 Hz  
AQ 1.0485760 sec  
RG 198.57  
DW 16.000 usec  
DE 6.50 usec  
TE 301.9 K  
D1 2.00000000 sec  
D11 0.03000000 sec  
TDO 1

===== CHANNEL f1 =====  
SF01 125.7990330 MHz  
NUC1 13C  
P1 10.00 usec  
PLW1 88.00000000 W

===== CHANNEL f2 =====  
SF02 500.2410010 MHz  
NUC2 1H  
CPDPRG[2] waltz16  
PCPD2 80.00 usec  
PLW2 22.00000000 W  
PLW12 0.35764000 W  
PLW13 0.17989001 W

F2 - Processing parameters  
SI 32768  
SF 125.7851966 MHz  
WDW EM  
SSB 0  
LB 1.00 Hz  
GB 0  
PC 1.40



# HP03.29-CDC13-C13CPD

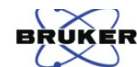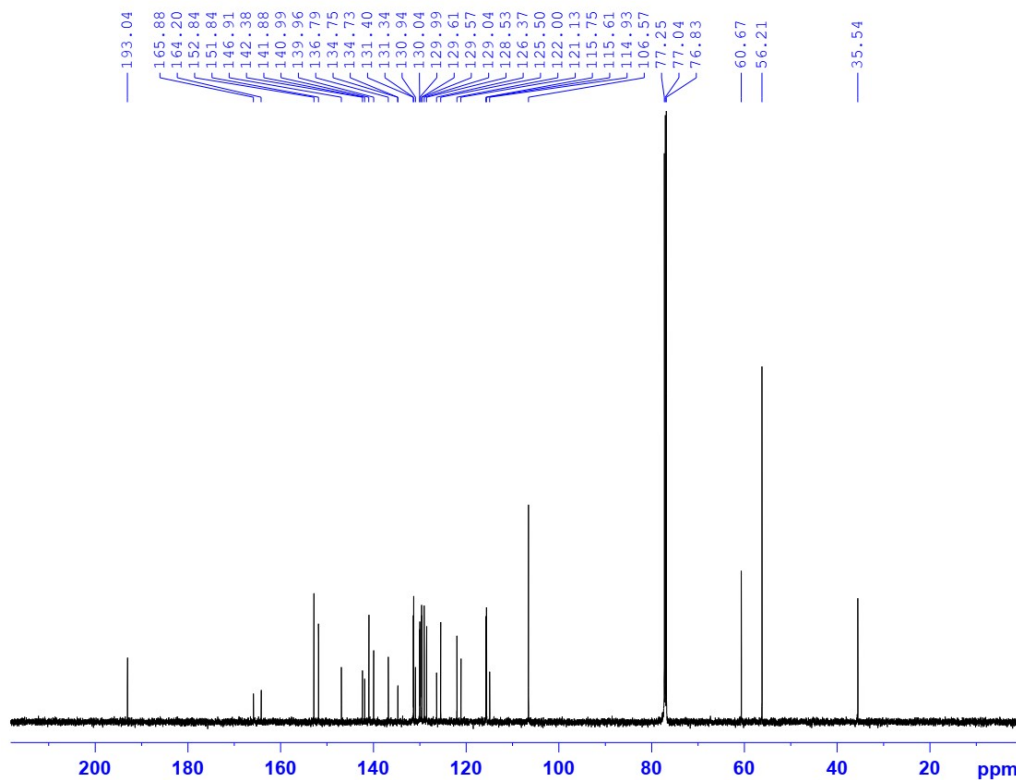

```

Current Data Parameters
NAME      HP03.29
EXPNO    2
PROCNO   1

F2 - Acquisition Parameters
Date_    20230410
Time     18.09 h
INSTRUM  AvanceNEO 600MHz
PROBHD   2114607_0862 (
PULPROG  _zgpg30
TD       65536
SOLVENT  CDC13
NS       258
DS       4
SWH      38461.539 Hz
FIDRES   1.173753 Hz
AQ       0.8519680 sec
RG       101
DM       13.000 usec
DE       6.50 usec
TE       300.1 K
D1       2.00000000 sec
d11      0.03000000 sec
TD0      1
SF01     150.9873069 MHz
NUC1     13C
P0       4.20 usec
P1       12.60 usec
PLW1     86.32800293 W
SF02     600.4024016 MHz
NUC2     1H
CPDPRG2  waltz65
PCPD2    80.00 usec
PLW2     27.03700066 W
PLW12    0.46375001 W
PLW13    0.30399001 W

F2 - Processing parameters
SI       32768
SF       150.9707001 MHz
WDW      EM
SSB      0
LB       1.00 Hz
GB       0
FC       1.40
    
```

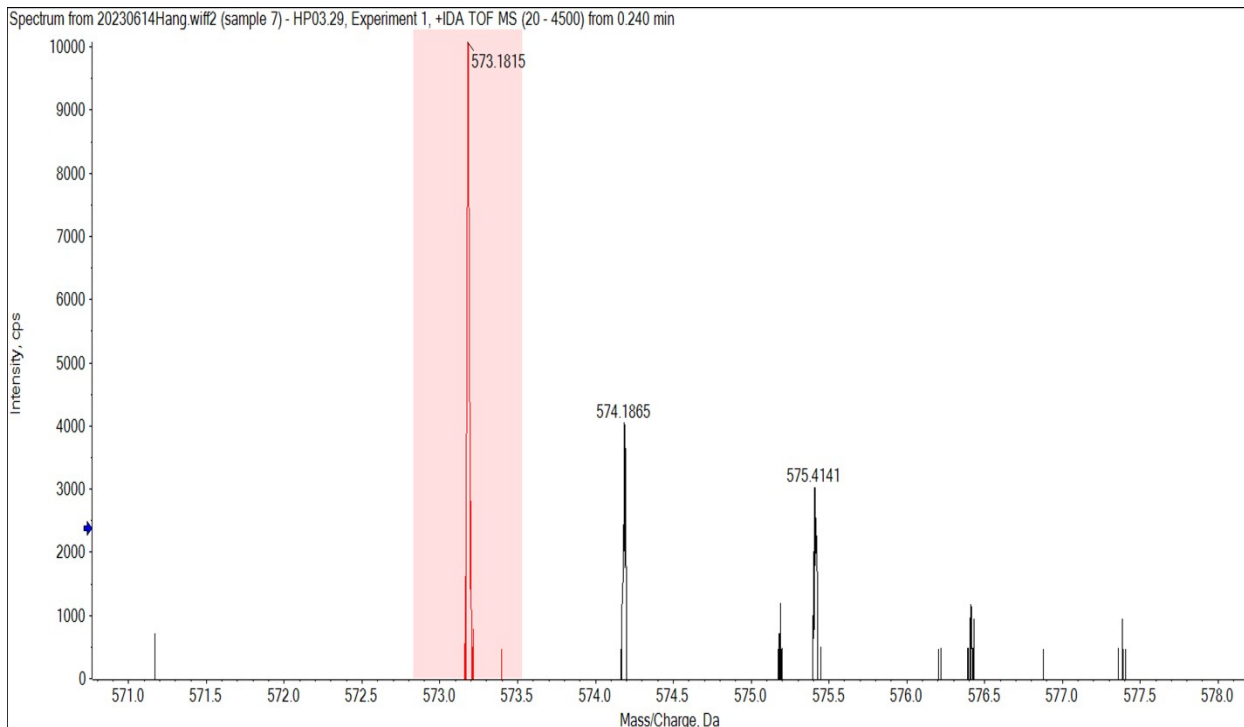

# (4-Fluorophenyl)(1-phenyl-1H-benzo[a]pyrano[2,3-c]phenazin-2-yl)methanone (7h).

HP03.32-CDC13-1H

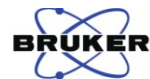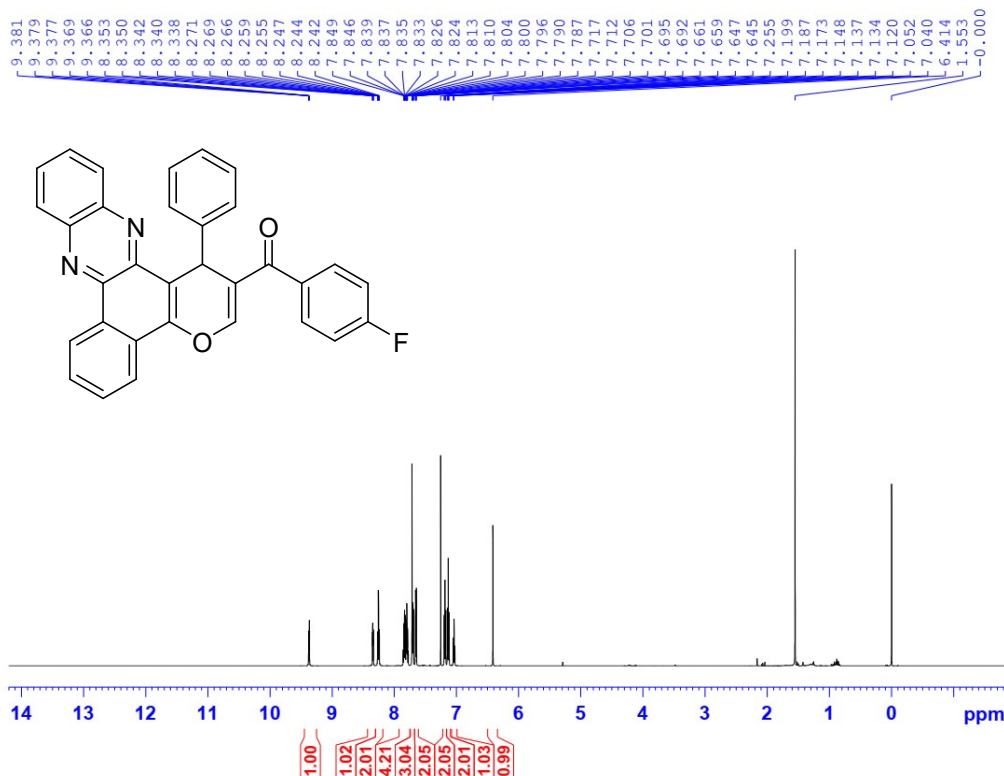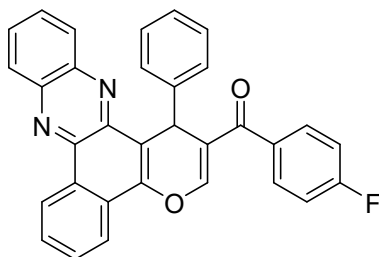

Current Data Parameters  
 NAME 6HP03.32  
 EXPNO 10  
 PROCNO 1

F2 - Acquisition Parameters  
 Date\_ 20230405  
 Time 17.51 h  
 INSTRUM AvanceNEO 600MHz  
 PROBHD z114607\_0862 ( )  
 PULPROG zg30  
 TD 65536  
 SOLVENT cdcl3  
 NS 16  
 DS 2  
 SWH 11904.762 Hz  
 FIDRES 0.363304 Hz  
 AQ 2.7525120 sec  
 RG 101  
 DW 42.000 usec  
 DE 8.71 usec  
 TE 303.1 K  
 D1 1.0000000 sec  
 TDO 1  
 SF01 600.4037075 MHz  
 NUC1 1H  
 P0 3.50 usec  
 P1 10.50 usec  
 PLW1 27.03700066 W

F2 - Processing parameters  
 SI 65536  
 SF 600.4000168 MHz  
 WDW EM  
 SSB 0  
 LB 0.30 Hz  
 GB 0  
 FC 1.00

HP03.32-CDC13-C13CPD

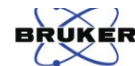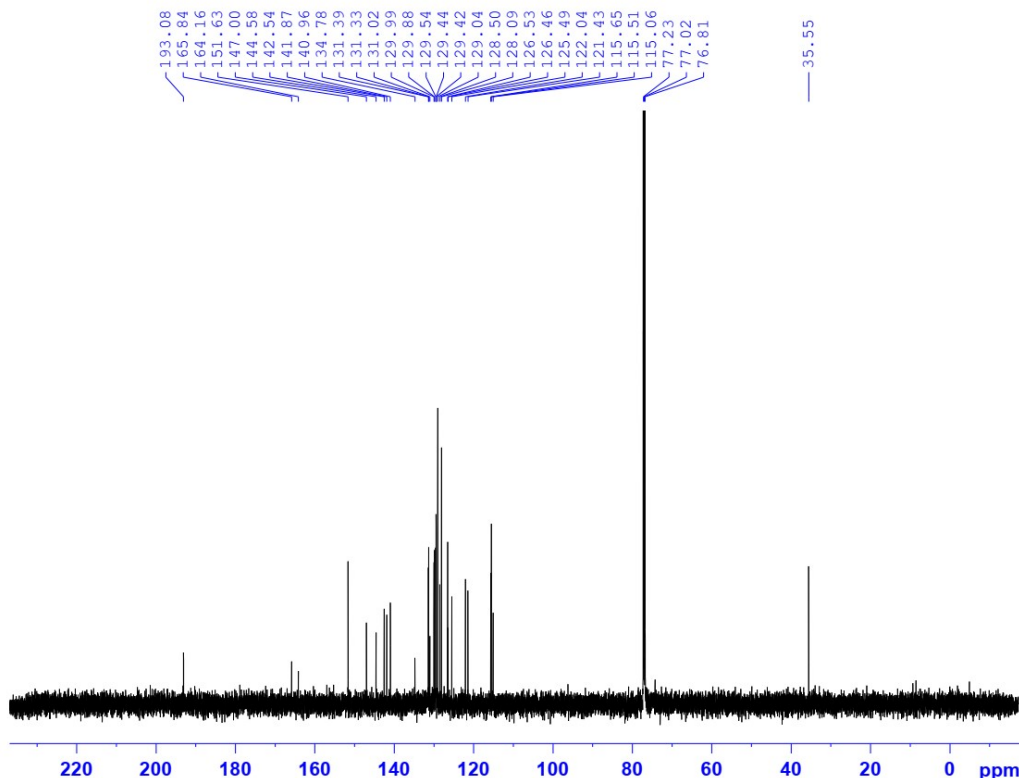

Current Data Parameters  
 NAME 6HP03.32  
 EXPNO 2  
 PROCNO 1

F2 - Acquisition Parameters  
 Date\_ 20230411  
 Time 18.25 h  
 INSTRUM AvanceNEO 600MHz  
 PROBHD z114607\_0862 ( )  
 PULPROG zgpg30  
 TD 65536  
 SOLVENT cdcl3  
 NS 258  
 DS 4  
 SWH 38461.539 Hz  
 FIDRES 1.173753 Hz  
 AQ 0.8519680 sec  
 RG 101  
 DW 13.000 usec  
 DE 6.50 usec  
 TE 300.1 K  
 D1 2.0000000 sec  
 D11 0.03000000 sec  
 TDO 1  
 SF01 150.9873069 MHz  
 NUC1 13C  
 P0 4.20 usec  
 P1 12.60 usec  
 PLW1 86.32800293 W  
 SFO2 600.4024016 MHz  
 NUC2 1H  
 CPDPRG[2] waltz65  
 PCPD2 80.00 usec  
 PLW2 27.03700066 W  
 PLW12 0.46575001 W  
 PLW13 0.30599001 W

F2 - Processing parameters  
 SI 32768  
 SF 150.9707001 MHz  
 WDW EM  
 SSB 0  
 LB 1.00 Hz  
 GB 0  
 FC 1.40

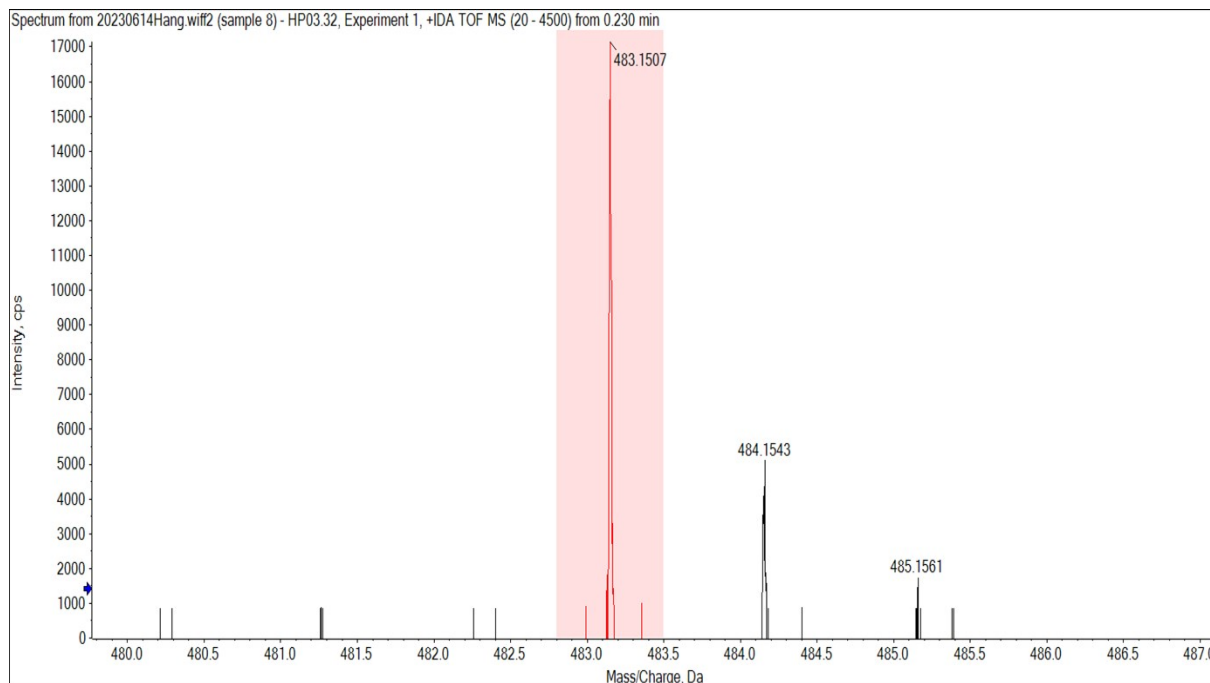

**(3-Bromophenyl)(1-(4-methoxyphenyl)-1H-benzo[a]pyrano[2,3-c]phenazin-2-yl)methanone (7i).**

HP03.36-CDC13-1H

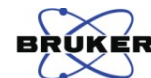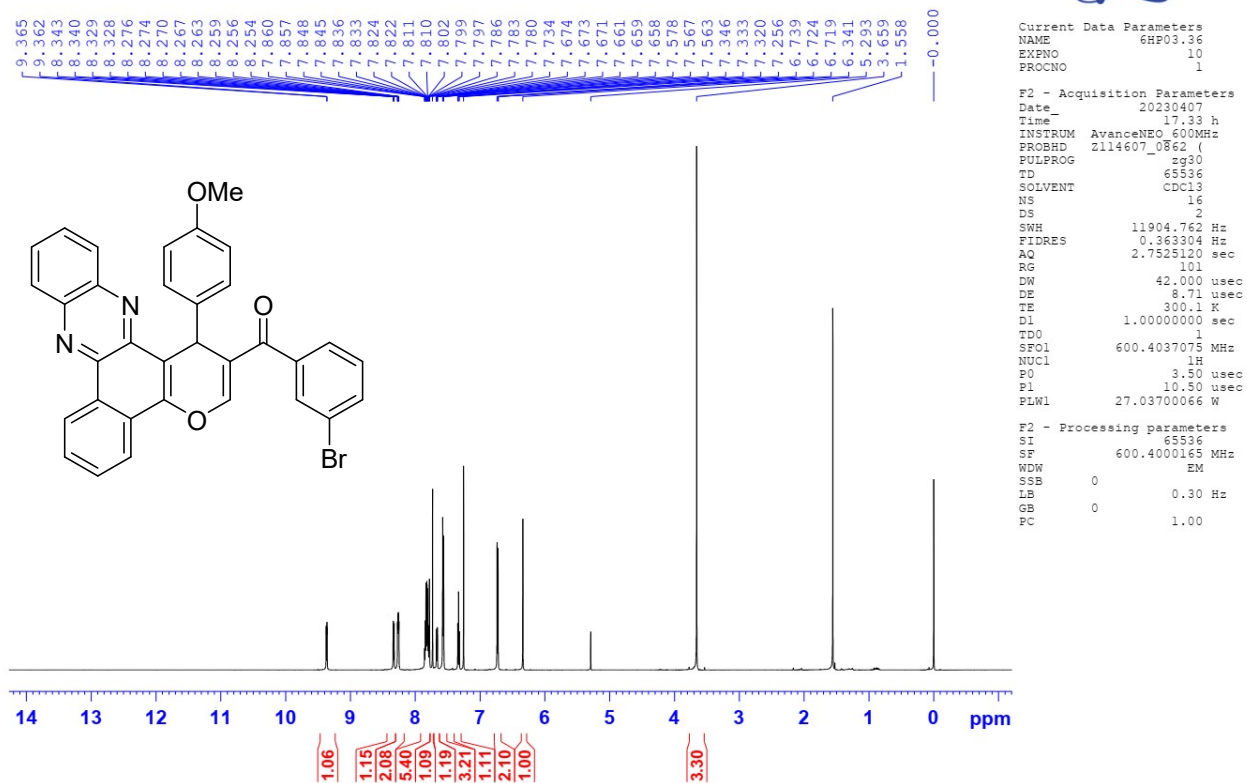

HP03.36-CDC13-C13CPD

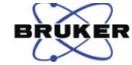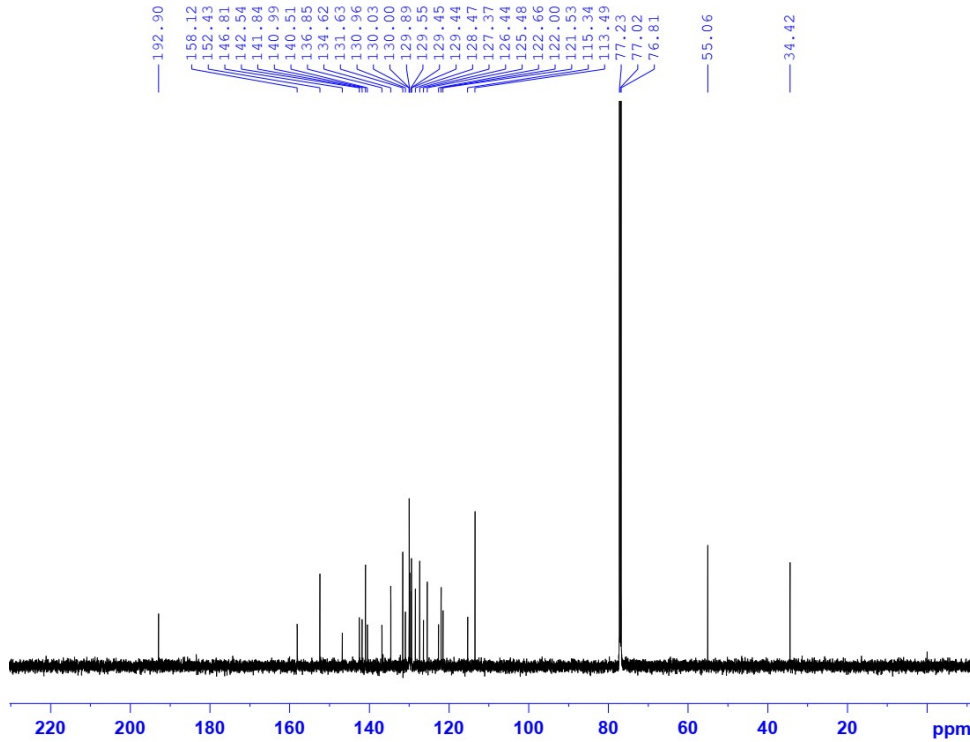

```

Current Data Parameters
NAME      6HP03.36
EXPNO    2
PROCNO   1

F2 - Acquisition Parameters
Date_    20230410
Time     18.42 h
INSTRUM  AvanceNEO 600MHz
PROBHD   Z114607_0862 (
PULPROG  zgpg30
TD        65536
SOLVENT  CDCl3
NS        258
DS         4
SWH       38461.539 Hz
FIDRES    1.173753 Hz
AQ         0.8519680 sec
RG         101
DW         13.000 usec
DE         6.50 usec
TE         300.1 K
D1         2.00000000 sec
D11        0.03000000 sec
TD0        1
SFO1      150.9873069 MHz
NUC1       13C
P0         4.20 usec
P1         12.60 usec
PLW1      86.32800293 W
SFO2      600.4024016 MHz
NUC2       1H
CPDPRG2   waltz65
PCPD2     80.00 usec
PLW2      27.03700066 W
PLW12     0.46575001 W
PLW13     0.305999001 W

F2 - Processing parameters
SI         32768
SF         150.9707001 MHz
WDW        EM
SSB         0
LB         1.00 Hz
GB         0
PC         1.40
    
```

(3-Bromophenyl)(1-(naphthalen-2-yl)-1H-benzo[a]pyrano[2,3-c]phenazin-2-yl)methanone (7j).

HP03.38-CDC13-1H

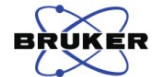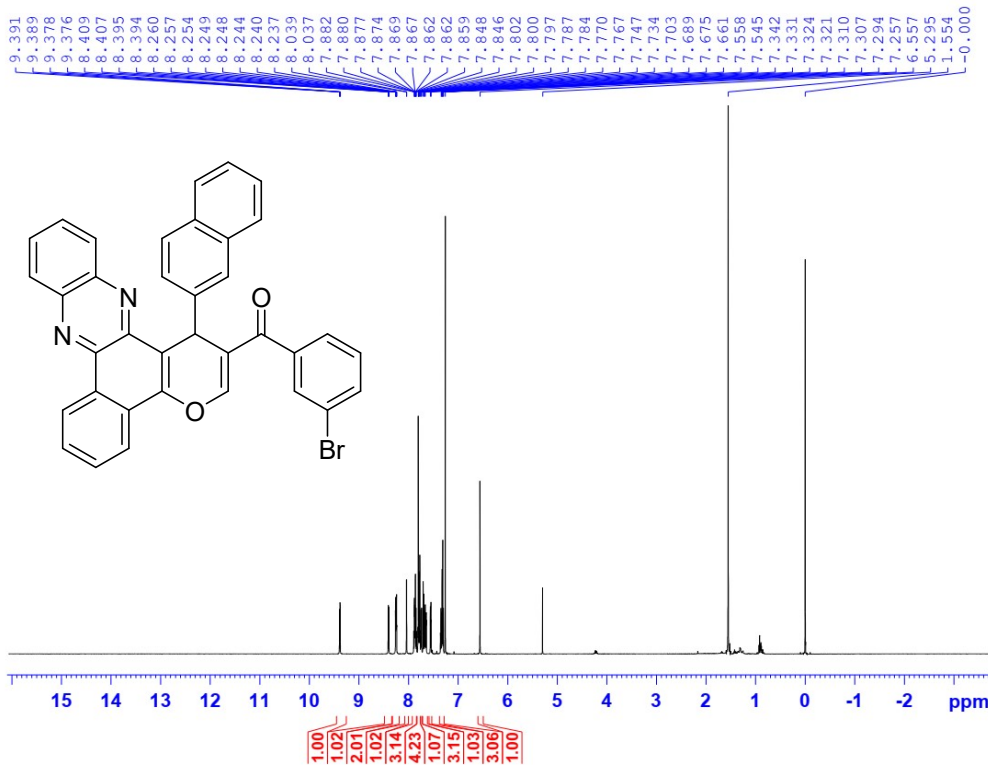

```

Current Data Parameters
NAME      6HP03.38
EXPNO    10
PROCNO   1

F2 - Acquisition Parameters
Date_    20230407
Time     17.50 h
INSTRUM  AvanceNEO 600MHz
PROBHD   Z114607_0862 (
PULPROG  zg30
TD        65536
SOLVENT  CDCl3
NS        16
DS         2
SWH       11904.762 Hz
FIDRES    0.363304 Hz
AQ         2.7525120 sec
RG         101
DW         42.000 usec
DE         8.71 usec
TE         300.1 K
D1         1.00000000 sec
TD0        1
SFO1      600.4037075 MHz
NUC1       1H
P0         3.50 usec
P1         10.50 usec
PLW1      27.03700066 W

F2 - Processing parameters
SI         65536
SF         600.4000158 MHz
WDW        EM
SSB         0
LB         0.30 Hz
GB         0
PC         1.00
    
```

HP03.38-CDC13-C13CPD

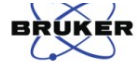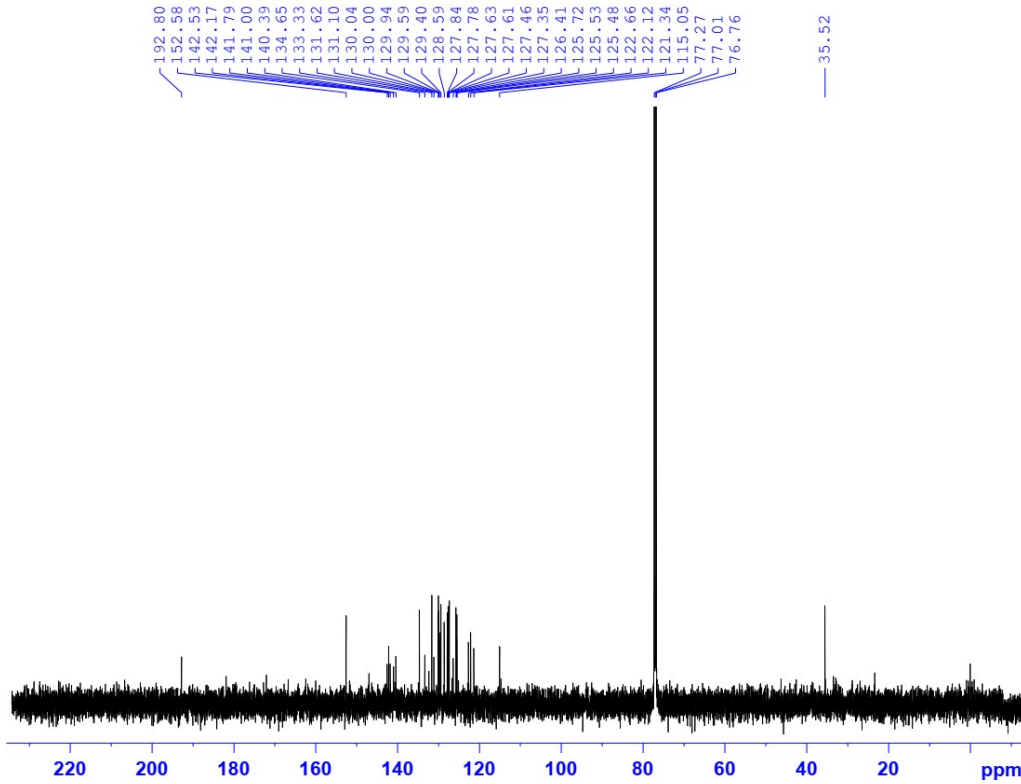

Current Data Parameters  
 NAME 6HP03.38  
 EXPNO 2  
 PROCNO 1

F2 - Acquisition Parameters  
 Date\_ 20230410  
 Time 17.23  
 INSTRUM spect  
 PROBHD 5 mm PABBO BB/  
 PULPROG zgpg30  
 TD 65536  
 SOLVENT CDC13  
 NS 256  
 DS 4  
 SWH 31250.000 Hz  
 FIDRES 0.476837 Hz  
 AQ 1.0485760 sec  
 RG 198.57  
 DW 16.000 usec  
 DE 6.50 usec  
 TE 301.6 K  
 D1 2.00000000 sec  
 D11 0.03000000 sec  
 TD0 1

==== CHANNEL f1 =====  
 SFO1 125.7990330 MHz  
 NUC1 13C  
 P1 10.00 usec  
 PLW1 88.00000000 W

==== CHANNEL f2 =====  
 SFO2 500.2410010 MHz  
 NUC2 1H  
 CPDPRG2 waltz16  
 PCPD2 80.00 usec  
 PLN2 22.00000000 W  
 PLW2 0.35764000 W  
 PLW12 0.17989001 W  
 PLW13 0.17989001 W

F2 - Processing parameters  
 SI 32768  
 SF 125.7851966 MHz  
 WDW EM  
 SSB 0  
 LB 1.00 Hz  
 GB 0  
 PC 1.40

(1-(Benzo[d][1,3]dioxol-5-yl)-1H-benzo[a]pyrano[2,3-c]phenazin-2-yl)(3-bromophenyl)methanone (7k).

HP03.48-CDC13-1H

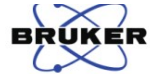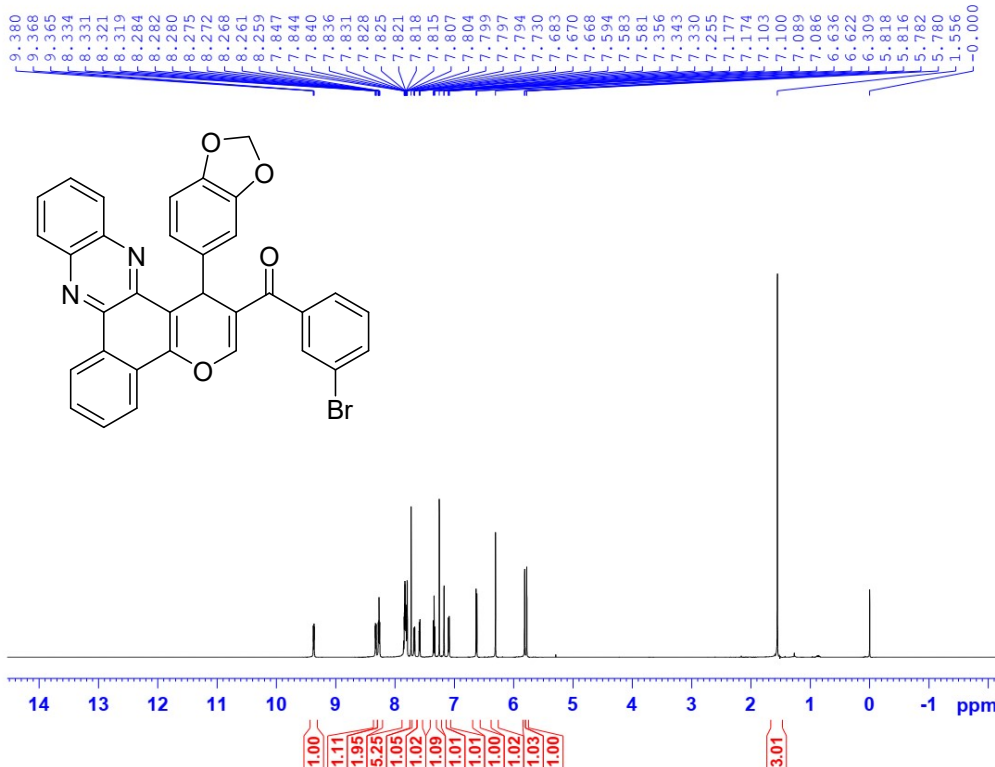

Current Data Parameters  
 NAME 6HP03.48  
 EXPNO 10  
 PROCNO 1

F2 - Acquisition Parameters  
 Date\_ 20230417  
 Time 17.30 h  
 INSTRUM AvanceNeo 600MHz  
 PROBHD 2114607\_D862 (4  
 PULPROG zg30  
 TD 65536  
 SOLVENT CDC13  
 NS 16  
 DS 2  
 SWH 11904.762 Hz  
 FIDRES 0.363304 Hz  
 AQ 2.7525120 sec  
 RG 101  
 DW 42.000 usec  
 DE 8.71 usec  
 TE 303.1 K  
 D1 1.00000000 sec  
 TD0 1  
 SFO1 600.4037075 MHz  
 NUC1 1H  
 P0 3.50 usec  
 P1 10.50 usec  
 PLW1 27.03700066 W

F2 - Processing parameters  
 SI 65536  
 SF 600.4000171 MHz  
 WDW EM  
 SSB 0  
 LB 0.30 Hz  
 GB 0  
 PC 1.00

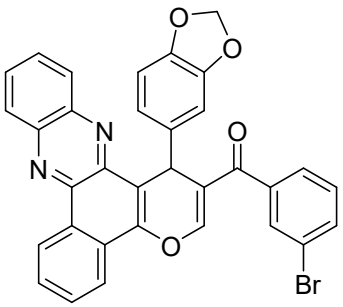

HP03.48-CDC13-C13CPD

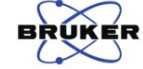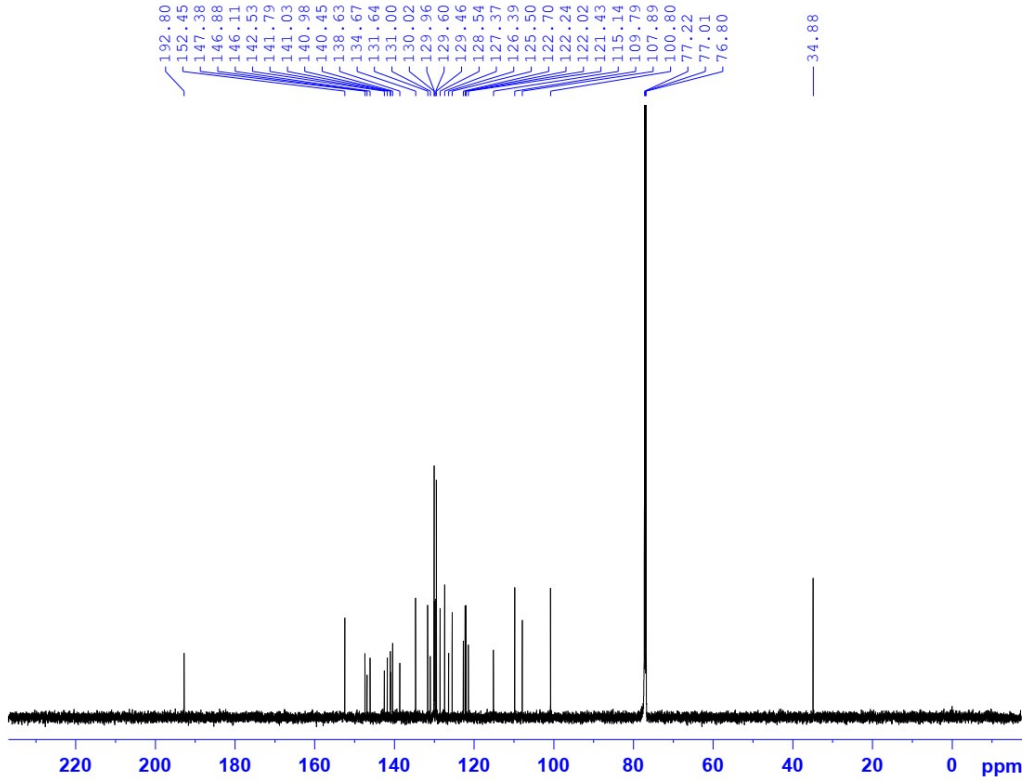

Current Data Parameters  
NAME 6HP03.48  
EXPNO 2  
PROCNO 1

F2 - Acquisition Parameters  
Date\_ 20230418  
Time 21.18 h  
INSTRUM AvanceNEO 600MHz  
PROBHD 2114607\_0862 (   
PULPROG zgpg30  
TD 65536  
SOLVENT cdc13  
NS 1024  
DS 4  
SWH 38461.539 Hz  
FIDRES 1.173753 Hz  
AQ 0.8519680 sec  
RG 101  
DW 13.000 usec  
DE 6.50 usec  
TE 303.2 K  
D1 2.00000000 sec  
D11 0.03000000 sec  
TD0 1  
SFO1 150.9873069 MHz  
NUC1 13C  
P0 4.20 usec  
P1 12.60 usec  
PLM1 86.32800293 W  
SFO2 600.4024016 MHz  
NUC2 1H  
CPDPRG2 waltz65  
PCPD2 80.00 usec  
PLW2 27.03700066 W  
PLM2 0.46575001 W  
PLW3 0.30599001 W

F2 - Processing parameters  
SI 32768  
SF 150.9707001 MHz  
WDW EM  
SSB 0  
LB 1.00 Hz  
GB 0  
PC 1.40

Spectrum from 20230614Hang.wif2 (sample 11) - HP03.48, Experiment 1, +IDA TOF MS (20 - 4500) from 0.297 min

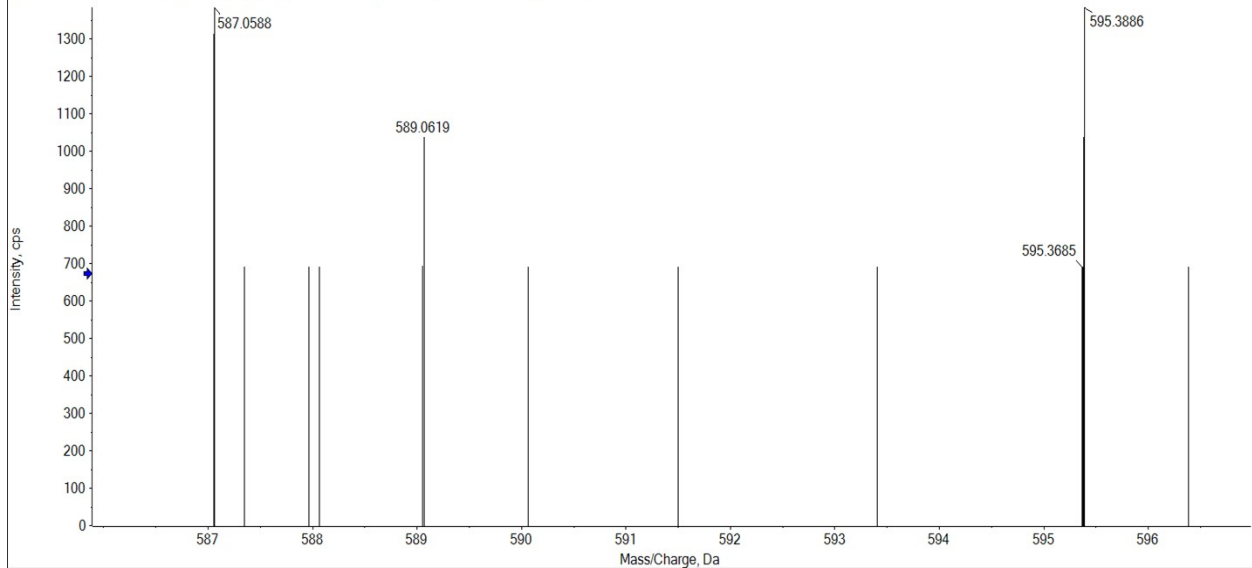

# (3-Bromophenyl)(1-(2-fluorophenyl)-1H-benzo[a]pyrano[2,3-c]phenazin-2-yl)methanone (7I).

DH03.50-CDC13-1H

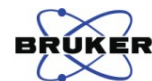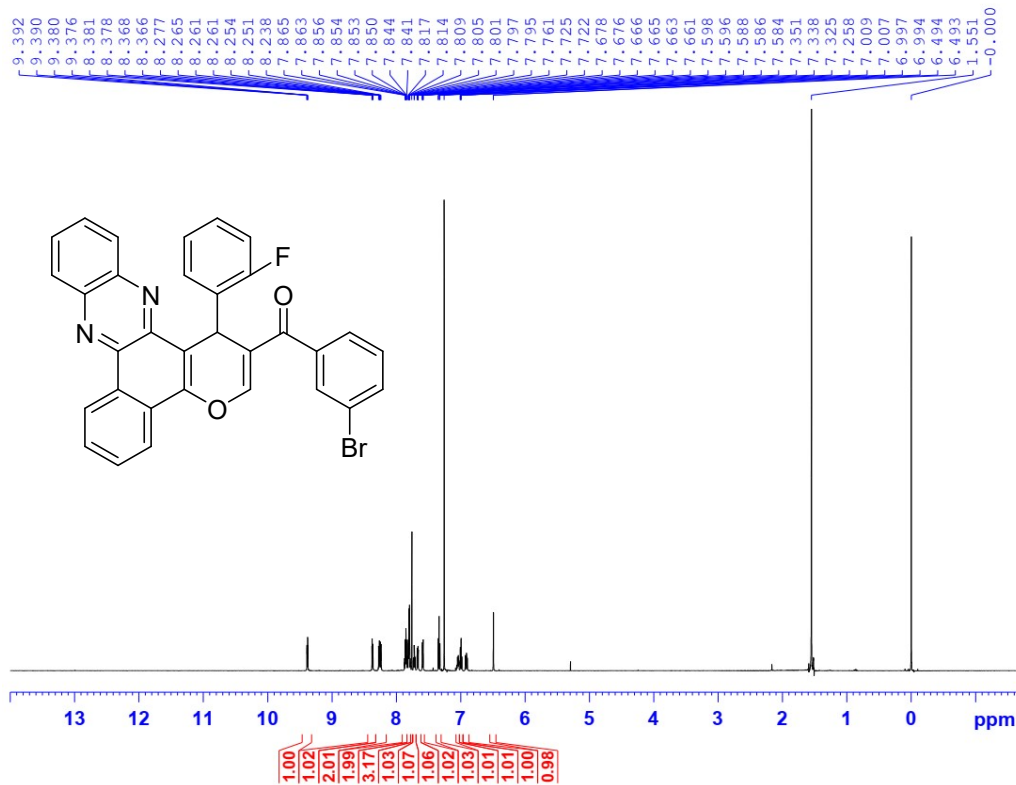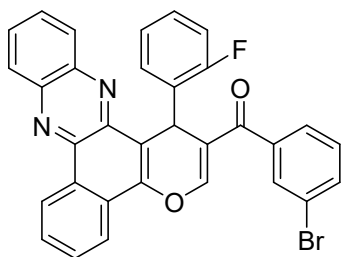

DH03.50-CDC13-C13CPD

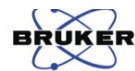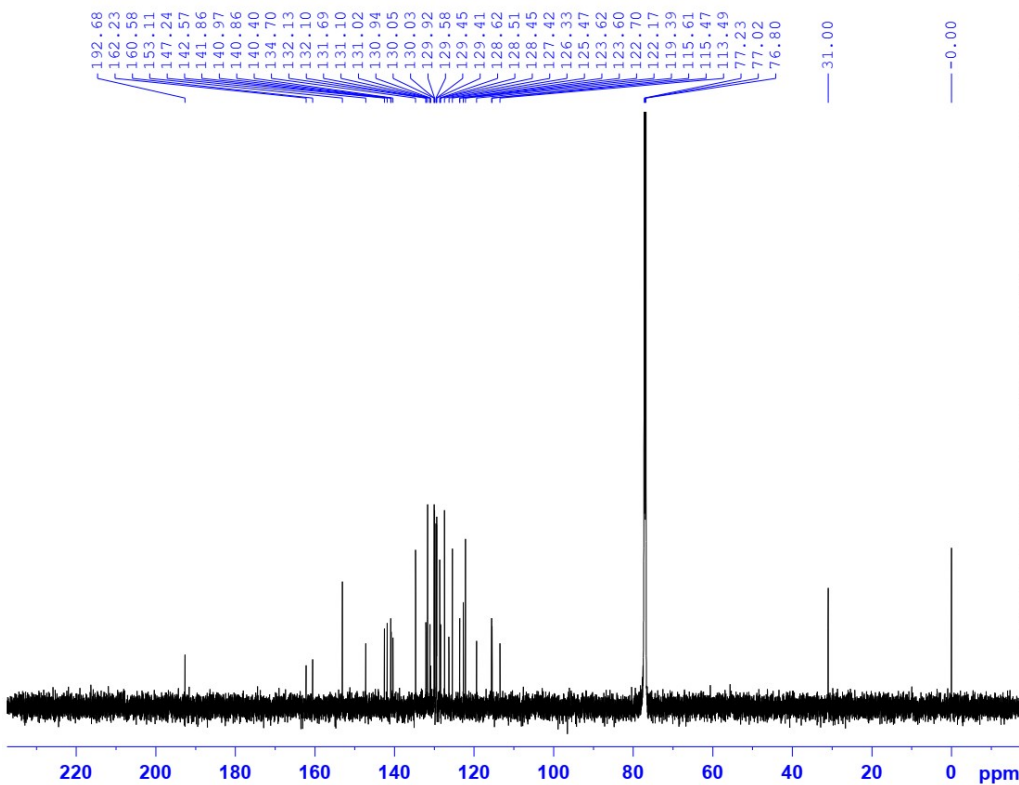

# (2-Chlorophenyl)(1-(2,3,4-trimethoxyphenyl)-1H-benzo[a]pyrano[2,3-c]phenazin-2-yl)methanone (7m).

HP03.44-CDC13-1H

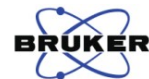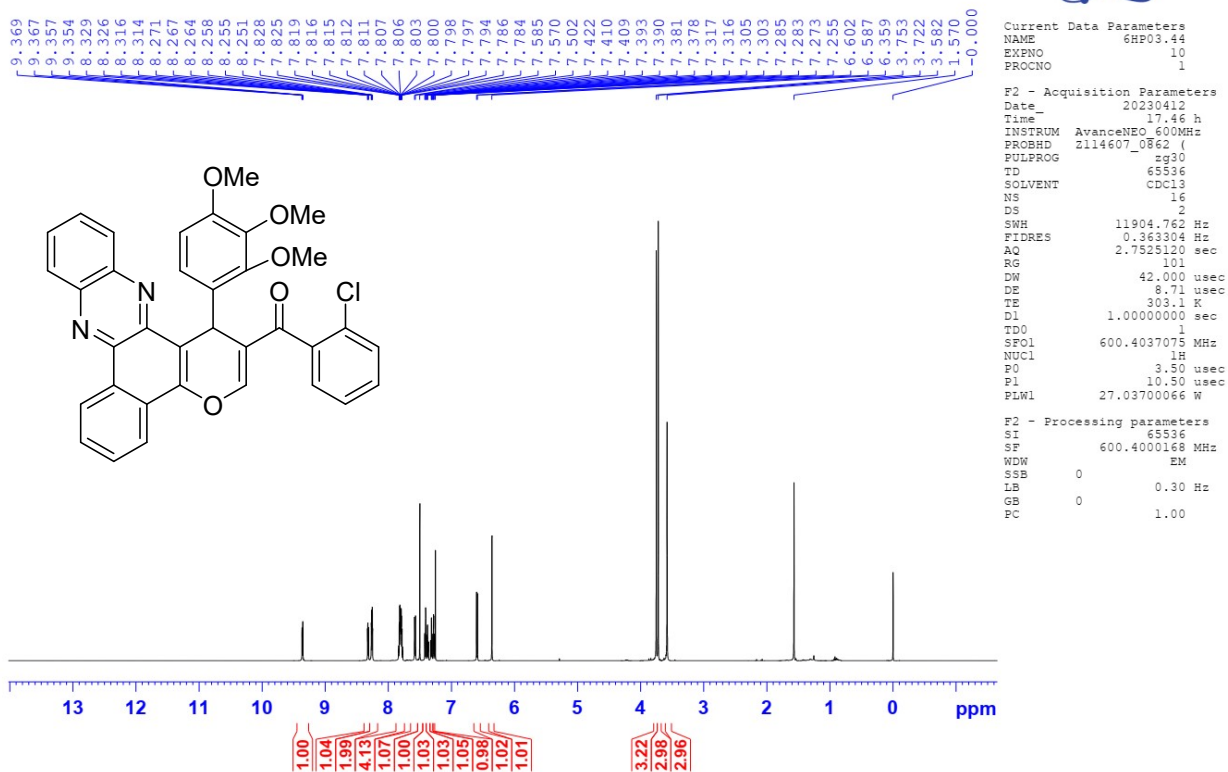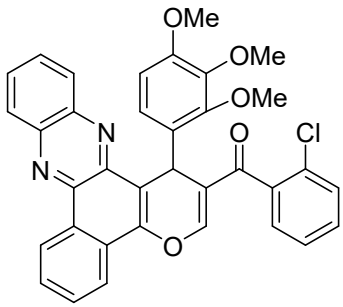

HP03.44-CDC13-C13CPD

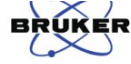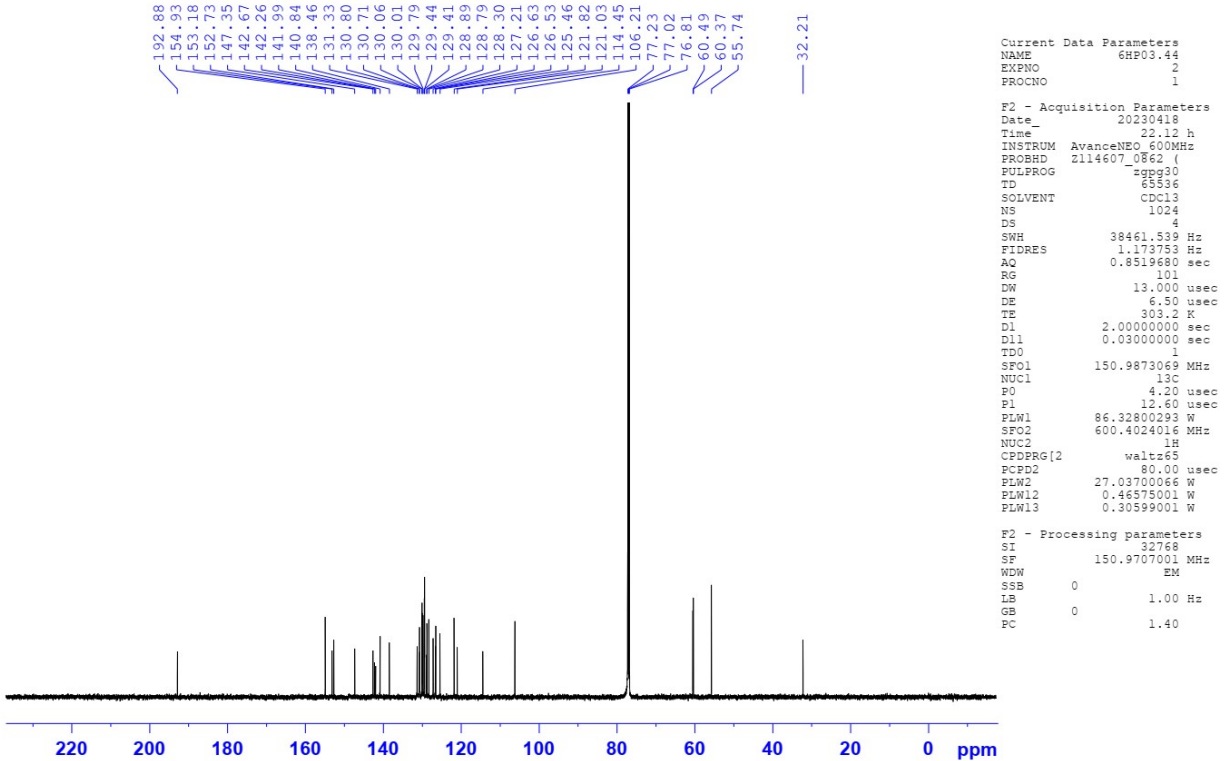

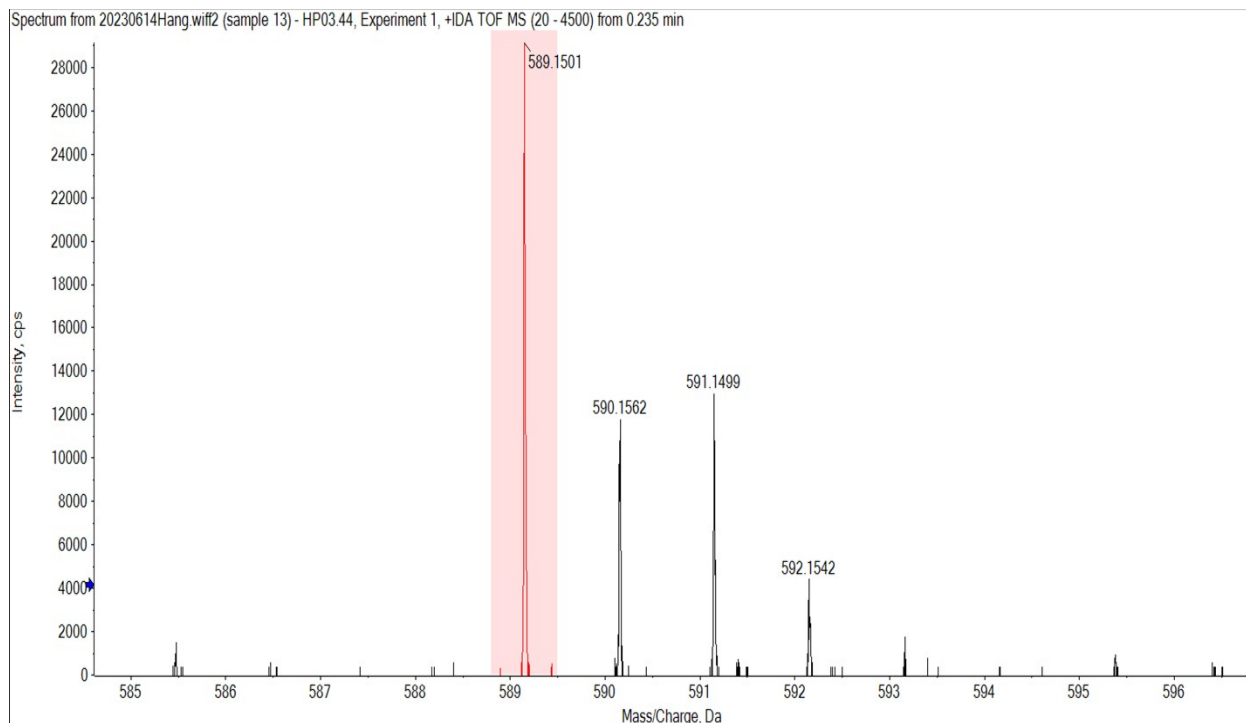

**(2-Chlorophenyl)(1-(p-tolyl)-1H-benzo[a]pyrano[2,3-c]phenazin-2-yl)methanone (7n).**

HP03.46-CDCl3-1H

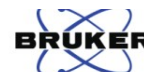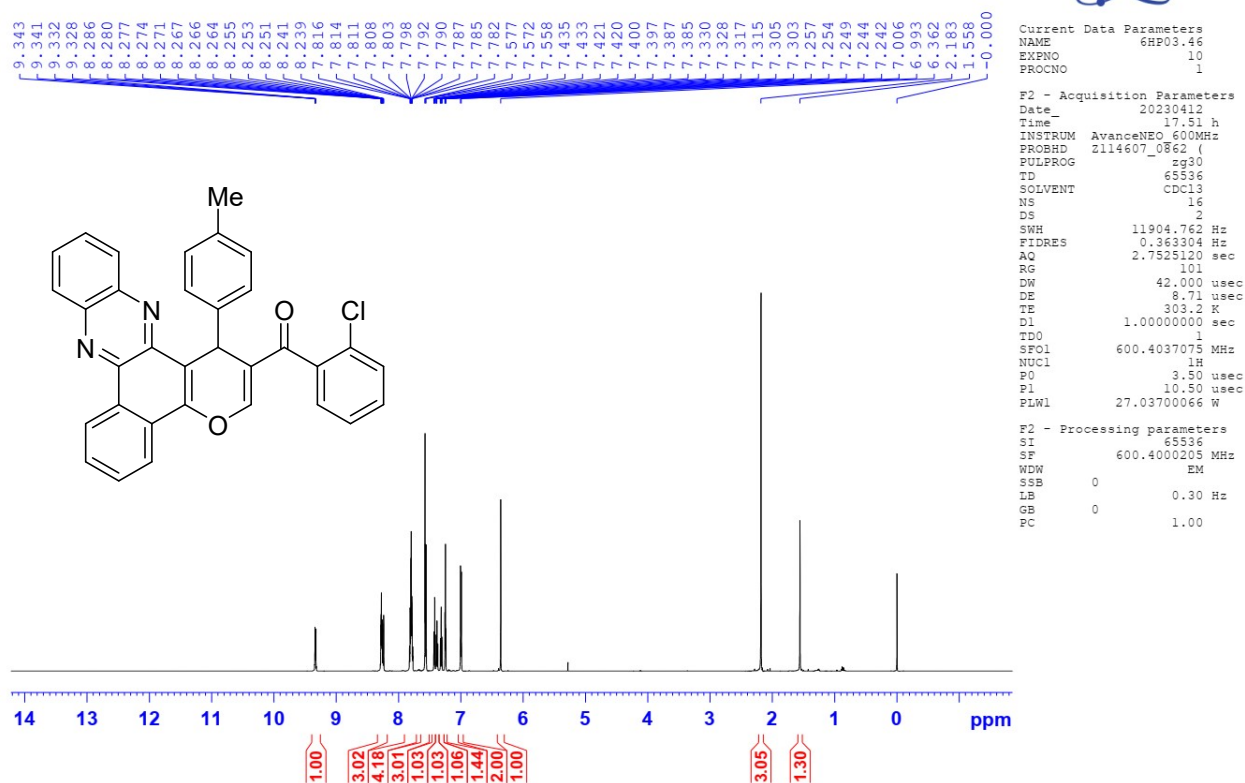

HP03.46-CDC13-C13CPD

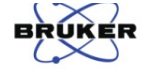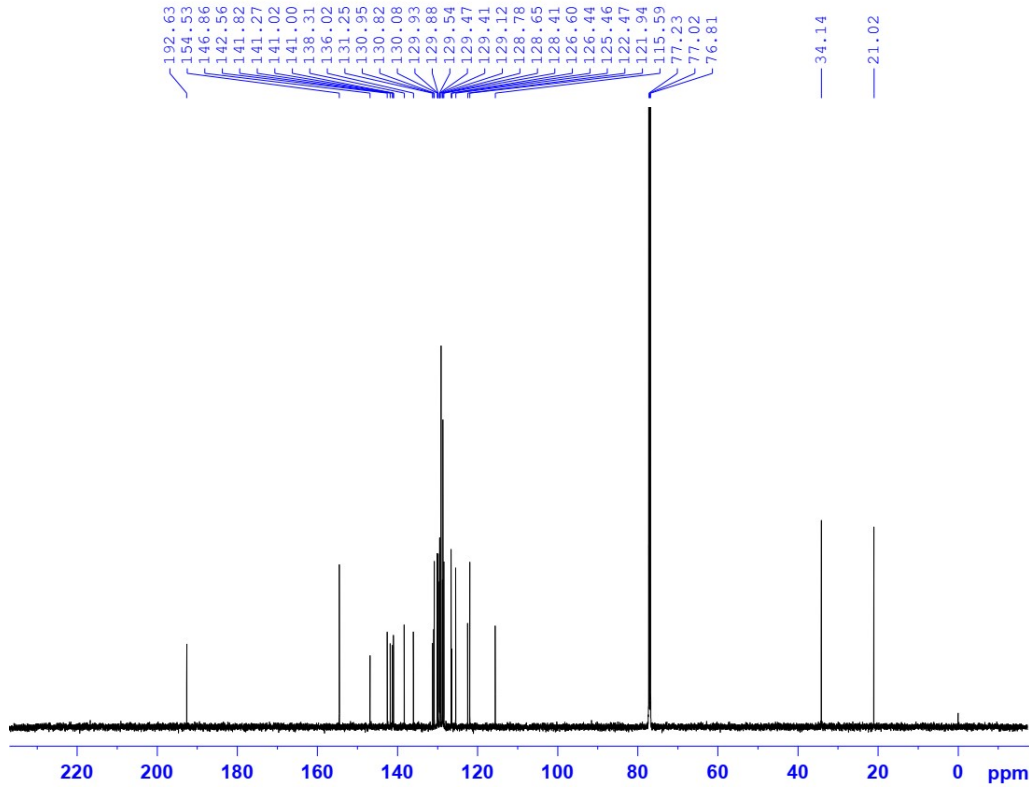

Current Data Parameters  
NAME 6HP03.46  
EXPNO 2  
PROCNO 1

F2 - Acquisition Parameters  
Date\_ 20230418  
Time 23.08 h  
INSTRUM AvanceNEO 600MHz  
PROBHD zll4607\_0862 (1  
PULPROG zgpg30  
TD 65536  
SOLVENT CDC13  
NS 1024  
DS 4  
SWH 38461.539 Hz  
FIDRES 1.173753 Hz  
AQ 0.8519680 sec  
RG 101  
DM 13.000 usec  
DE 6.50 usec  
TE 303.2 K  
D1 2.00000000 sec  
D11 0.03000000 sec  
TD0 1  
SF01 150.9873069 MHz  
NUC1 13C  
PO 4.20 usec  
P1 12.60 usec  
PLW1 86.32800293 W  
SFO2 600.4024016 MHz  
NUC2 1H  
CPDPRG[2] waltz65  
PCPD2 80.00 usec  
PLW2 27.03700066 W  
PLW12 0.46575001 W  
PLW13 0.30599001 W

F2 - Processing parameters  
SI 32768  
SF 150.9707001 MHz  
WDW EM  
SSB 0  
LB 1.00 Hz  
GB 0  
PC 1.40

Spectrum from 20230614Hang.wiff2 (sample 14) - HP03.46, Experiment 1, +IDA TOF MS (20 - 4500) from 0.210 min

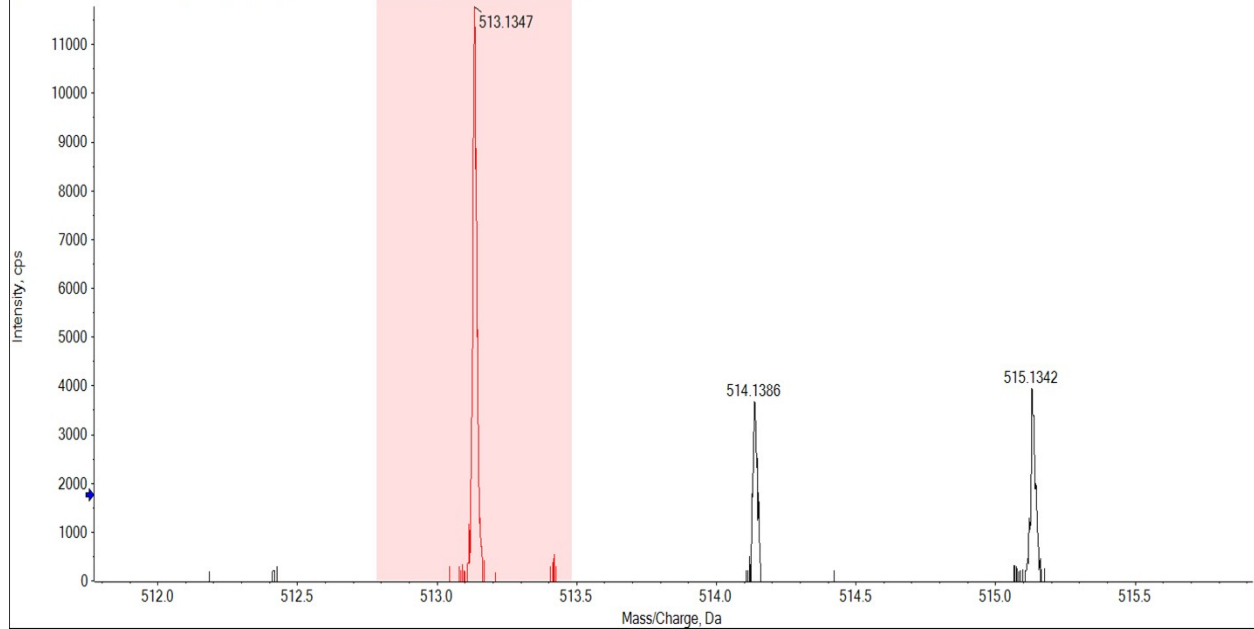

# (2-Chlorophenyl)(1-(4-fluorophenyl)-1H-benzo[a]pyrano[2,3-c]phenazin-2-yl)methanone (7o).

HP03.47-CDC13-1H

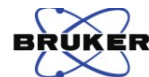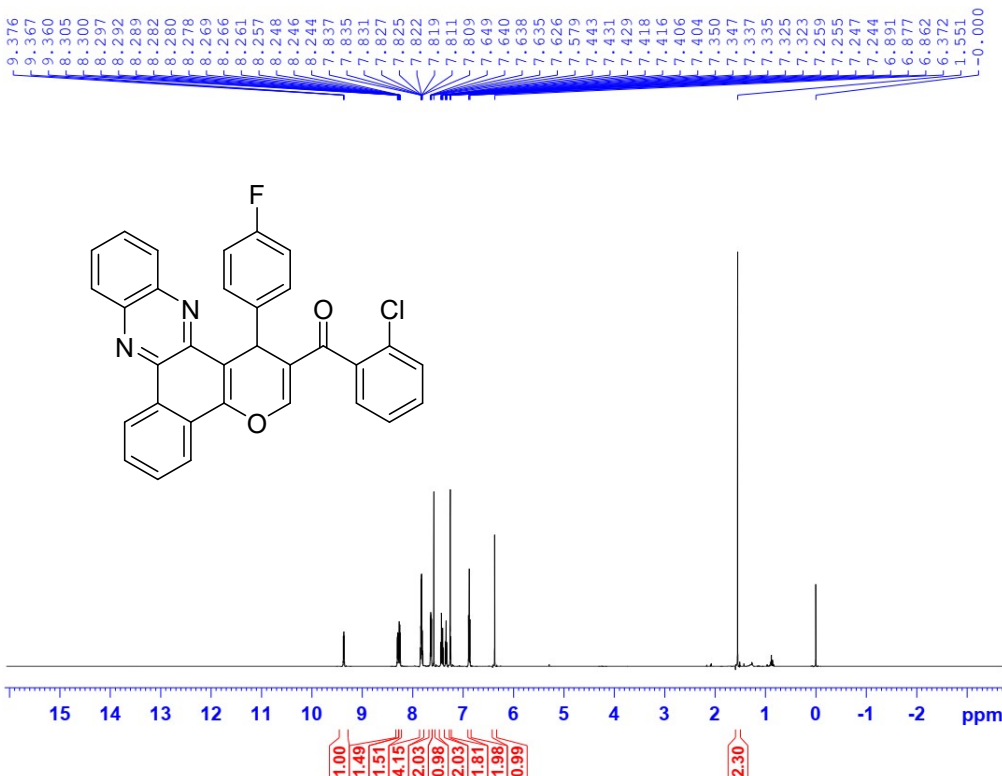

```

Current Data Parameters
NAME      6HP03.47
EXPNO    1
PROCNO   1

F2 - Acquisition Parameters
Date_    20230417
Time     17.25 h
INSTRUM  AvanceNEO 600MHz
PROBHD   Z114607_0862 (
PULPROG  zg30
TD       65536
SOLVENT  CDCl3
NS       16
DS       2
SWH      11904.762 Hz
FIDRES   0.363304 Hz
AQ       2.7525120 sec
RG       101
DM       42.000 usec
DE       8.71 usec
TE       303.1 K
D1       1.00000000 sec
TD0      1
SF01     600.4037075 MHz
NUC1     1H
PC       3.50 usec
P1       10.50 usec
PLW1     27.03700066 W

F2 - Processing parameters
SI       65536
SF       600.4000168 MHz
WDW      EM
SSB      0
LB       0.30 Hz
GB       0
PC       1.00
    
```

HP03.47-CDC13-C13CPD

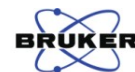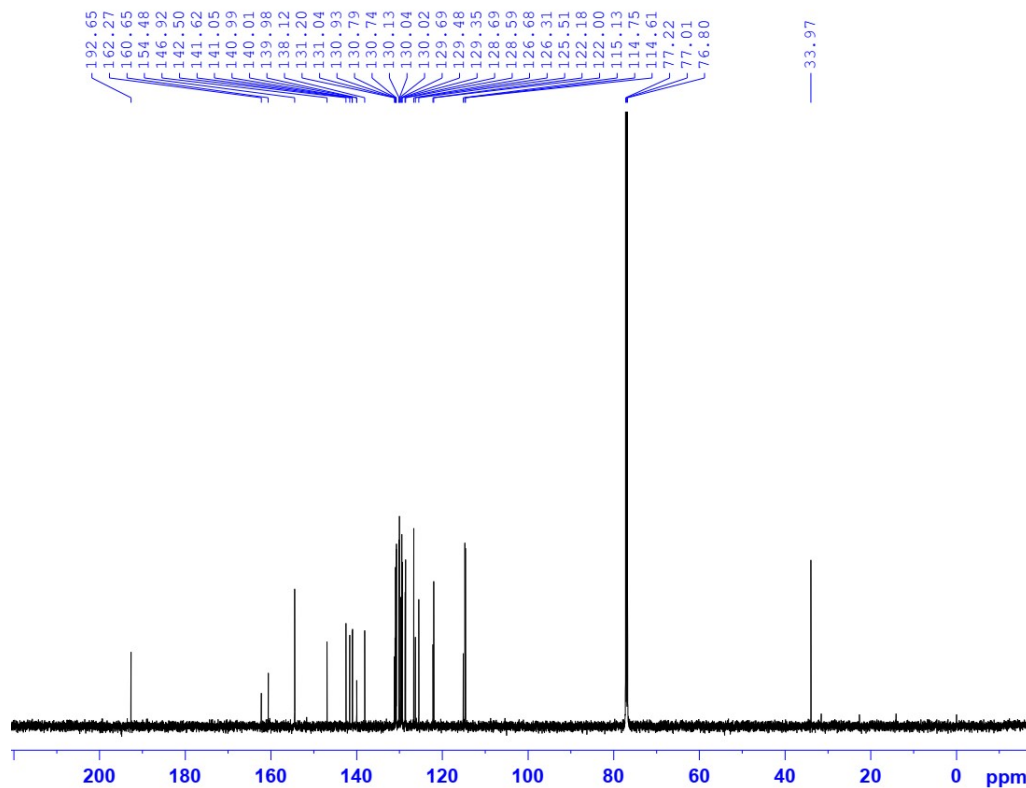

```

Current Data Parameters
NAME      6HP03.47
EXPNO    2
PROCNO   1

F2 - Acquisition Parameters
Date_    20230419
Time     0.02 h
INSTRUM  AvanceNEO 600MHz
PROBHD   Z114607_0862 (
PULPROG  zgpg30
TD       65536
SOLVENT  CDCl3
NS       1024
DS       4
SWH      38461.539 Hz
FIDRES   1.173753 Hz
AQ       0.8519680 sec
RG       101
DM       13.000 usec
DE       6.50 usec
TE       303.2 K
D1       2.00000000 sec
D11      0.03000000 sec
TD0      1
SF01     150.9873069 MHz
NUC1     13C
PC       4.20 usec
P1       12.60 usec
PLW1     86.32800293 W
SF02     600.4024016 MHz
NUC2     1H
CPDPRG2  waltz65
PCPD2    80.00 usec
PLW2     27.03700066 W
PLW12    0.46575001 W
PLW13    0.30599001 W

F2 - Processing parameters
SI       32768
SF       150.9707001 MHz
WDW      EM
SSB      0
LB       1.00 Hz
GB       0
PC       1.40
    
```

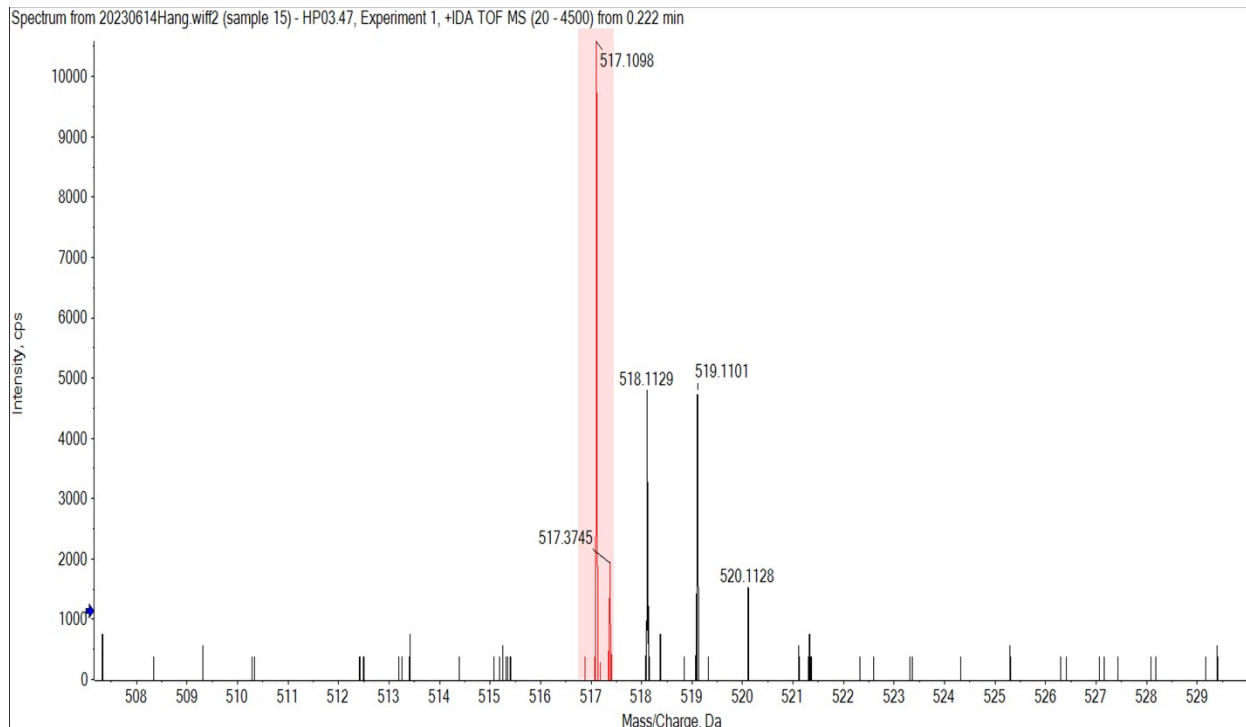

**(2-chlorophenyl)(1-(3,4-dimethoxyphenyl)-1H-benzo[a]pyrano[2,3-c]phenazin-2-yl)methanone (7p).**

HP03.51.02-CDCl3-1H

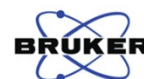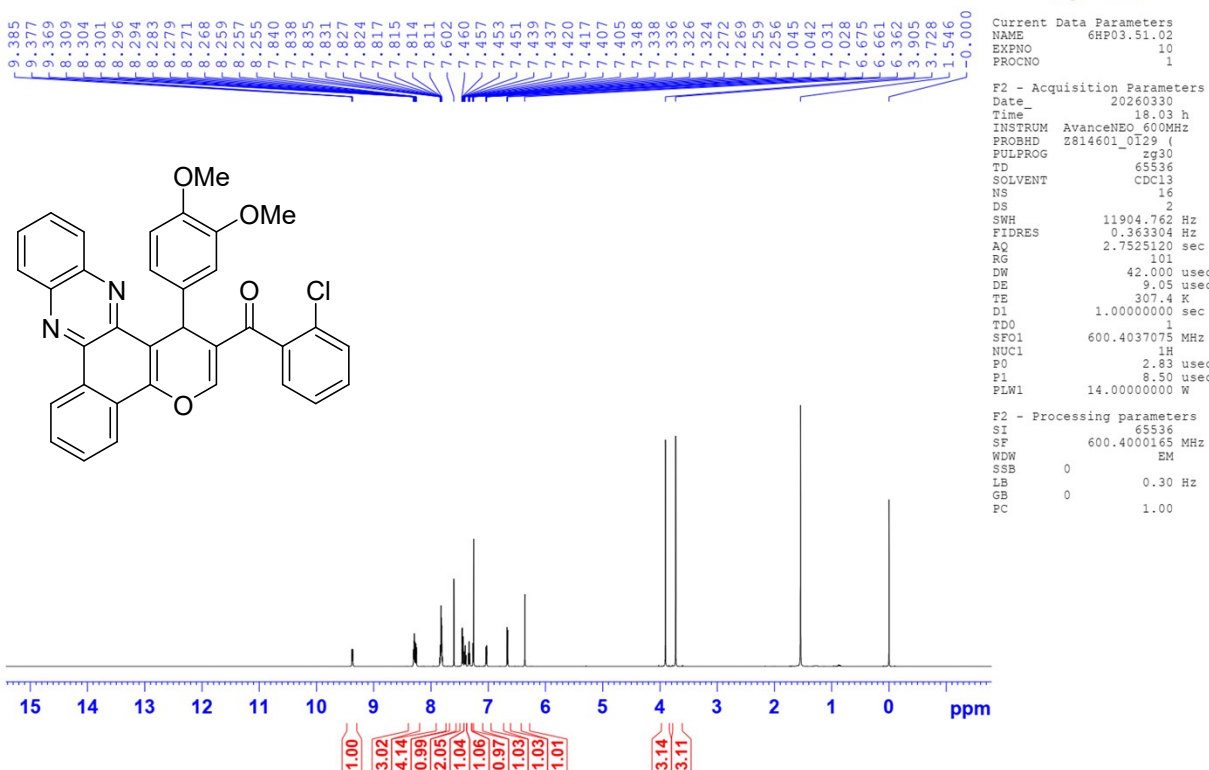

HP03.51.02-CDC13-C13CPD

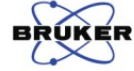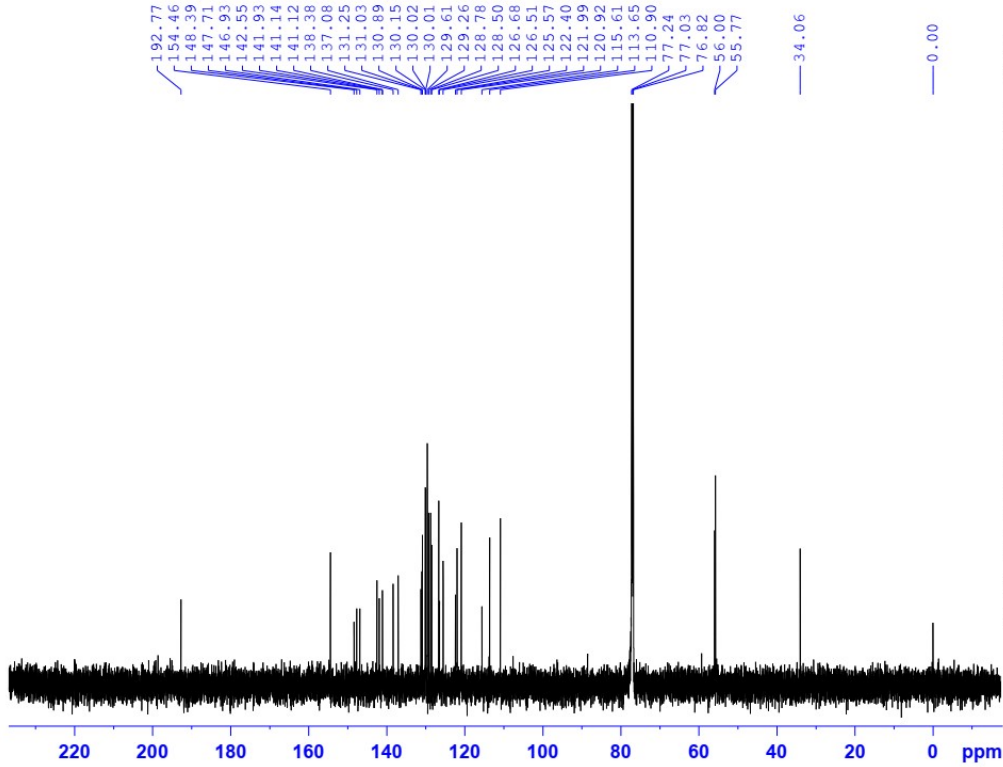

Current Data Parameters  
 NAME 6HP03.51.02  
 EXPNO 2  
 PROCNO 1

F2 - Acquisition Parameters  
 Date\_ 20260331  
 Time\_ 8.12 h  
 INSTRUM AvanceNEO 600MHz  
 PROBRD Z814601\_0129 ( 600)30  
 PULPROG zgpg30  
 TD 65536  
 SOLVENT CDC13  
 NS 1024  
 DS 4  
 SWH 38461.539 Hz  
 FIDRES 1.173753 Hz  
 AQ 0.8519680 sec  
 RG 101  
 DW 13.000 usec  
 DE 6.50 usec  
 TE 309.3 K  
 D1 2.00000000 sec  
 D11 0.03000000 sec  
 TDO 1  
 SFO1 150.9873069 MHz  
 NUCL1 13C  
 P0 5.63 usec  
 P1 16.90 usec  
 PLW1 126.55000305 W  
 SFO2 600.4024016 MHz  
 NUCL2 1H  
 CPDPRG2 waltz65  
 PCPD2 70.00 usec  
 PLW2 14.00000000 W  
 PLW12 0.20643000 W  
 PLW13 0.10383000 W

F2 - Processing parameters  
 SI 32768  
 SF 150.9706931 MHz  
 WDW EM  
 SSB 0  
 LB 1.00 Hz  
 GB 0  
 PC 1.40

Spectrum from 20230614Hang.wiff2 (sample 16) - HP03.51, Experiment 1, +IDA TOF MS (20 - 4500) from 0.300 min

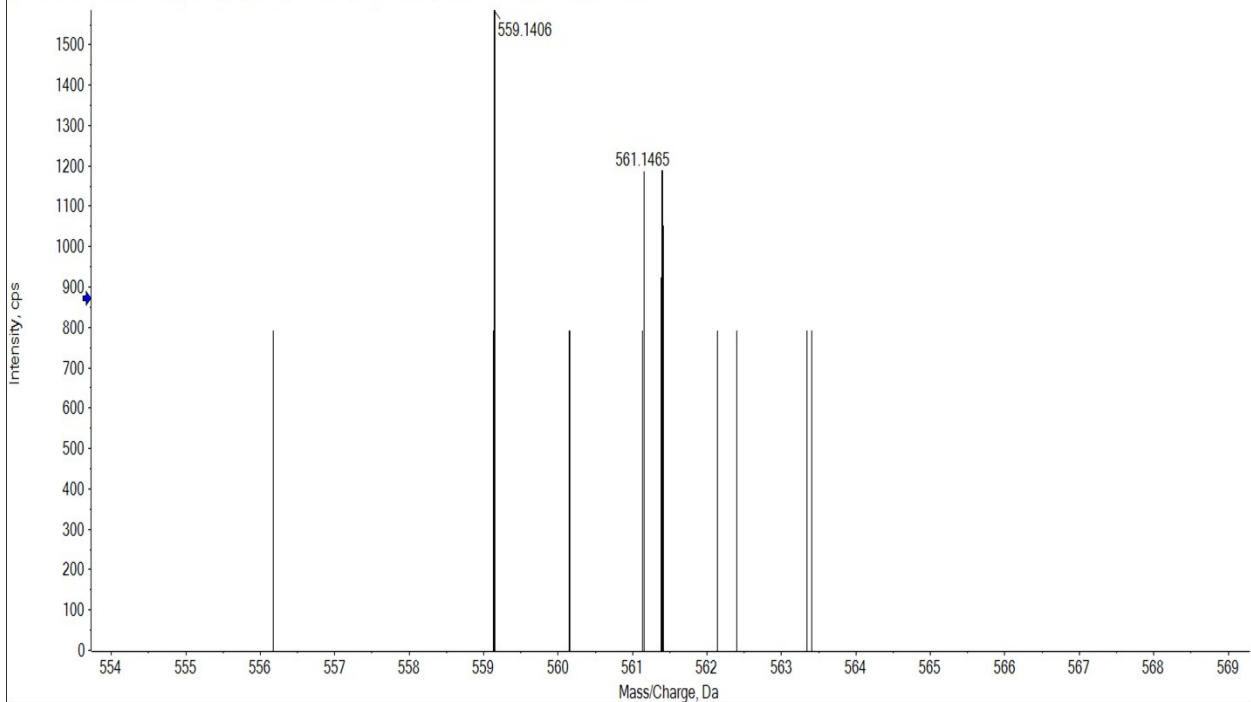

**Table S1.** Inhibitory effect of 7a-p on NO production in LPS-mediated macrophage RAW 264.7 cells and cell viability of RAW 264.7 cells

| Entry                  | Compound         | Concentration (µg/ml)  | NO inhibition (%) | Cell viability (%) |
|------------------------|------------------|------------------------|-------------------|--------------------|
| 1.                     | 7a               | 64                     | 80                | 96                 |
|                        |                  | 16                     | 72                | 100                |
|                        |                  | 4                      | 64                | 100                |
|                        |                  | 1                      | 46                | 100                |
|                        |                  | 0.25                   | 35                | 100                |
|                        |                  | <b>IC<sub>50</sub></b> | <b>1.67±0.2</b>   |                    |
| 2.                     | 7b               | 64                     | 66                | 87                 |
|                        |                  | 16                     | 60                | 92                 |
|                        |                  | 4                      | 55                | 94                 |
|                        |                  | 1                      | 42                | 95                 |
|                        |                  | 0.25                   | 6                 | 95                 |
|                        |                  | <b>IC<sub>50</sub></b> | <b>2.85±0.32</b>  |                    |
| 3.                     | 7c               | 64                     | 81                | 85                 |
|                        |                  |                        |                   |                    |
|                        |                  | 16                     | 69                | 96                 |
|                        |                  | 4                      | 58                | 100                |
|                        |                  | 1                      | 51                | 100                |
|                        |                  | 0.25                   | 31                | 100                |
| <b>IC<sub>50</sub></b> | <b>0.96±0.05</b> |                        |                   |                    |
| 4.                     | 7d               | 64                     | 67                | 93                 |
|                        |                  | 16                     | 61                | 100                |
|                        |                  | 4                      | 55                | 100                |
|                        |                  | 1                      | 54                | 100                |
|                        |                  | 0.25                   | 48                | 100                |
|                        |                  | <b>IC<sub>50</sub></b> | <b>0.5±0.05</b>   |                    |
| 5.                     | 7e               | 64                     | 72                | 78                 |
|                        |                  | 16                     | 66                | 87                 |
|                        |                  | 4                      | 62                | 88                 |
|                        |                  | 1                      | 48                | 90                 |
|                        |                  | 0.25                   | 41                | 93                 |
|                        |                  | <b>IC<sub>50</sub></b> | <b>1.43±0.08</b>  |                    |
| 6.                     | 7f               | 64                     | 66                | 88                 |
|                        |                  | 16                     | 52                | 96                 |
|                        |                  | 4                      | 40                | 97                 |
|                        |                  | 1                      | 21                | 100                |
|                        |                  | 0.25                   | 0                 | 100                |
|                        |                  | <b>IC<sub>50</sub></b> | <b>14.00±1.20</b> |                    |
| 7.                     | 7g               | 64                     | 85                | 81                 |
|                        |                  | 16                     | 82                | 100                |

| Entry | Compound  | Concentration (µg/ml)  | NO inhibition (%) | Cell viability (%) |
|-------|-----------|------------------------|-------------------|--------------------|
|       |           | 4                      | 71                | 100                |
|       |           | 1                      | 55                | 100                |
|       |           | 0.25                   | 31                | 100                |
|       |           | <b>IC<sub>50</sub></b> | <b>0.84±0.07</b>  |                    |
| 8.    | <b>7h</b> | 64                     | 64                | 74                 |
|       |           | 16                     | 59                | 100                |
|       |           | 4                      | 53                | 100                |
|       |           | 1                      | 50                | 100                |
|       |           | 0.25                   | 36                | 100                |
|       |           | <b>IC<sub>50</sub></b> | <b>1.0±0.15</b>   |                    |
| 9.    | <b>7i</b> | 64                     | 66                | 70                 |
|       |           | 16                     | 57                | 72                 |
|       |           | 4                      | 44                | 84                 |
|       |           | 1                      | 6                 | 91                 |
|       |           | 0.25                   | 0                 | 100                |
|       |           | <b>IC<sub>50</sub></b> | <b>9.54±0.5</b>   |                    |
| 10.   | <b>7j</b> | 64                     | 70                | 80                 |
|       |           | 16                     | 59                | 94                 |
|       |           | 4                      | 20                | 100                |
|       |           | 1                      | 6                 | 100                |
|       |           | 0.25                   | 0                 | 100                |
|       |           | <b>IC<sub>50</sub></b> | <b>13.23±1.44</b> |                    |
| 11.   | <b>7k</b> | 64                     | 76                | 100                |
|       |           | 16                     | 60                | 100                |
|       |           | 4                      | 54                | 100                |
|       |           | 1                      | 22                | 100                |
|       |           | 0.25                   | 11                | 100                |
|       |           | <b>IC<sub>50</sub></b> | <b>3.63±0.15</b>  |                    |
| 12.   | <b>7l</b> | 64                     | 82                | 70                 |
|       |           | 16                     | 60                | 75                 |
|       |           | 4                      | 59                | 85                 |
|       |           | 1                      | 57                | 92                 |
|       |           | 0.25                   | 12                | 93                 |
|       |           | <b>IC<sub>50</sub></b> | <b>0.88±0.05</b>  |                    |
| 13.   | <b>7m</b> | 64                     | 75                | 80                 |
|       |           | 16                     | 71                | 84                 |
|       |           | 4                      | 66                | 90                 |
|       |           | 1                      | 24                | 91                 |
|       |           | 0.25                   | 11                | 92                 |
|       |           | <b>IC<sub>50</sub></b> | <b>2.86±0.19</b>  |                    |
| 14.   | <b>7n</b> | 64                     | 65                | 67                 |
|       |           | 16                     | 61                | 76                 |
|       |           | 4                      | 30                | 94                 |

| Entry | Compound                                  | Concentration (µg/ml)  | NO inhibition (%) | Cell viability (%) |
|-------|-------------------------------------------|------------------------|-------------------|--------------------|
|       |                                           | 1                      | 9                 | 96                 |
|       |                                           | 0.25                   | 0                 | 97                 |
|       |                                           | <b>IC<sub>50</sub></b> | <b>11.74±0.85</b> |                    |
| 15.   | <b>7o</b>                                 | 64                     | 70                | 89                 |
|       |                                           | 16                     | 69                | 93                 |
|       |                                           | 4                      | 37                | 99                 |
|       |                                           | 1                      | 35                | 100                |
|       |                                           | 0.25                   | 29                | 100                |
|       |                                           | <b>IC<sub>50</sub></b> | <b>8.88±0.5</b>   |                    |
| 16.   | <b>7p</b>                                 | 64                     | 76                | 65                 |
|       |                                           | 16                     | 65                | 87                 |
|       |                                           | 4                      | 55                | 88                 |
|       |                                           | 1                      | 43                | 90                 |
|       |                                           | 0.25                   | 26                | 90                 |
|       |                                           | <b>IC<sub>50</sub></b> | <b>2.75±0.31</b>  |                    |
|       | Reference:                                | 128                    | 92                | 90                 |
|       | N <sup>G</sup> -Methyl-L-arginine acetate | 32                     | 85                | 99                 |
|       | (L-NMMA)                                  | 8                      | 63                | 99                 |
|       |                                           | 2                      | 29                | 100                |
|       |                                           | 0.5                    | 16                | 100                |
|       |                                           | <b>IC<sub>50</sub></b> | <b>5.71±0.5</b>   |                    |
